# Supplementary material
Source: publisher site journal article supplement (https://www.dovepress.com/article/444258)
Supplement: Supplementary file 1 [file get_supplementary_file.php]

**Supplementary Table 1: Details of the individual OvC samples taken for the present study**

| Lab ID | Date of collection | Age | Stage | Grade | Ethnicity | BMI  | CA 125, U/mL | Histological diagnosis              | Oncovertx score |
|--------|--------------------|-----|-------|-------|-----------|------|--------------|-------------------------------------|-----------------|
| 590    | 1/18/2017          | 44  | IA    | G3    | Caucasian | 23   | 516          | clear cell carcinoma                | 0.585953508     |
| 591    | 2/17/2017          | 56  | IA    | G2    | Caucasian | 30.5 | 616          | endometrioid adenocarcinoma         | 0.215004951     |
| 592    | 3/1/2017           | 41  | IA    | G2    | Caucasian | 21   | 618          | endometrioid adenocarcinoma         | 2.976959341     |
| 593    | 4/7/2017           | 56  | IA    | N/A   | Caucasian | 39.7 | 368          | mucinous adenocarcinoma             | 0.155238382     |
| 597    | 9/26/2017          | 51  | IA    | G3    | Caucasian | 24.8 | 620          | serous papillary cystadenocarcinoma | 0.973010363     |
| 598    | 11/9/2017          | 54  | IA    | G3    | Caucasian | 33.7 | 344.1        | serous cystadenocarcinoma           | -2.98465951     |
| 599    | 1/19/2018          | 61  | IA    | G2    | Caucasian | 30.5 | 562          | endometrioid adenocarcinoma         | 7.732220952     |
| 600    | 2/8/2018           | 58  | IC2   | N/A   | Caucasian | 41.5 | 960          | serous papillary cystadenocarcinoma | 7.635852173     |
| 601    | 2/13/2018          | 74  | IA    | G1    | Caucasian | 30.5 | 124.1        | endometrioid adenocarcinoma         | 6.147132319     |
| 602    | 2/15/2018          | 76  | IC2   | G3    | Caucasian | 17.7 | 294.3        | endometrioid adenocarcinoma         | 3.087762697     |
| 603    | 2/16/2018          | 48  | IC2   | G3    | Caucasian | 24.5 | 905.8        | endometrioid adenocarcinoma         | 6.519591536     |
| 604    | 3/6/2018           | 47  | IA    | G1    | Caucasian | 27.9 | 346.8        | mucinous cystadenocarcinoma         | 4.459228386     |
| 605    | 3/30/2018          | 40  | IA    | G3    | Caucasian | 41.1 | 315          | serous adenocarcinoma               | 3.929442942     |
| 606    | 4/6/2018           | 44  | IB    | G1    | Caucasian | 25   | 127          | serous papillary adenocarcinoma     | 3.724426187     |
| 607    | 4/19/2018          | 62  | IA    | G2    | Caucasian | 32   | 486.1        | clear cell adenocarcinoma           | 6.784329624     |
| 608    | 5/4/2018           | 65  | IA    | G1    | Caucasian | 31.2 | 618          | serous papillary adenocarcinoma     | 4.95325685      |
| 609    | 7/18/2018          | 64  | IB    | G2    | Caucasian | 35.5 | 648          | endometrioid adenocarcinoma         | 9.761483534     |
| 610    | 7/26/2018          | 54  | IB    | N/A   | Caucasian | 41.9 | 448          | serous adenocarcinoma               | 4.263008104     |

|     |            |    |     |     |           |      |       |                                        |             |
|-----|------------|----|-----|-----|-----------|------|-------|----------------------------------------|-------------|
| 611 | 8/28/2018  | 68 | IA  | G3  | Caucasian | 22.2 | 536   | serous<br>cystadenocarcinoma           | 7.174091537 |
| 612 | 9/20/2018  | 68 | IA  | G2  | Caucasian | 27.5 | 684   | mucinous<br>adenocarcinoma             | 13.15506934 |
| 613 | 10/12/2018 | 41 | IA  | G2  | Caucasian | 21.1 | 426   | clear cell<br>adenocarcinoma           | 6.193406345 |
| 614 | 11/16/2018 | 55 | IA  | G3  | Caucasian | 25.5 | 175   | serous papillary<br>cystadenocarcinoma | 3.082299139 |
| 615 | 11/28/2018 | 59 | IA  | G1  | Caucasian | 29.1 | 545.8 | serous<br>adenocarcinoma               | 7.69678915  |
| 616 | 1/18/2017  | 44 | IA  | G3  | Caucasian | 23   | 516   | clear cell<br>carcinoma                | 4.5172806   |
| 617 | 2/17/2017  | 56 | IA  | G2  | Caucasian | 30.5 | 616   | endometrioid<br>adenocarcinoma         | 4.473991383 |
| 618 | 3/1/2017   | 41 | IA  | G2  | Caucasian | 21   | 618   | endometrioid<br>adenocarcinoma         | 4.73925368  |
| 619 | 4/7/2017   | 56 | IA  | N/A | Caucasian | 39.7 | 368   | mucinous<br>adenocarcinoma             | 7.798583803 |
| 623 | 9/26/2017  | 51 | IA  | G3  | Caucasian | 24.8 | 620   | serous papillary<br>cystadenocarcinoma | 6.66913668  |
| 624 | 11/9/2017  | 54 | IA  | G3  | Caucasian | 33.7 | 344.1 | serous<br>cystadenocarcinoma           | 1.723471789 |
| 625 | 1/19/2018  | 61 | IA  | G2  | Caucasian | 30.5 | 562   | endometrioid<br>adenocarcinoma         | 9.711730591 |
| 626 | 2/8/2018   | 58 | IC2 | N/A | Caucasian | 41.5 | 960   | serous papillary<br>cystadenocarcinoma | 4.672238816 |
| 627 | 2/13/2018  | 74 | IA  | G1  | Caucasian | 30.5 | 124.1 | endometrioid<br>adenocarcinoma         | 9.890444144 |
| 628 | 2/15/2018  | 76 | IC2 | G3  | Caucasian | 17.7 | 294.3 | endometrioid<br>adenocarcinoma         | 8.542257424 |
| 629 | 2/16/2018  | 48 | IC2 | G3  | Caucasian | 24.5 | 905.8 | endometrioid<br>adenocarcinoma         | 4.964029389 |
| 630 | 3/6/2018   | 47 | IA  | G1  | Caucasian | 27.9 | 346.8 | mucinous<br>cystadenocarcinoma         | 0.076587049 |
| 631 | 3/30/2018  | 40 | IA  | G3  | Caucasian | 41.1 | 315   | serous<br>adenocarcinoma               | 0.690005051 |
| 632 | 4/6/2018   | 44 | IB  | G1  | Caucasian | 25   | 127   | serous papillary<br>adenocarcinoma     | 4.925009979 |

|      |            |    |    |     |           |        |       |                                     |             |
|------|------------|----|----|-----|-----------|--------|-------|-------------------------------------|-------------|
| 633  | 4/19/2018  | 62 | IA | G2  | Caucasian | 32     | 486.1 | clear cell adenocarcinoma           | 5.798929934 |
| 634  | 5/4/2018   | 65 | IA | G1  | Caucasian | 31.2   | 618   | serous papillary adenocarcinoma     | 6.482817159 |
| 635  | 7/18/2018  | 64 | IB | G2  | Caucasian | 35.5   | 648   | endometrioid adenocarcinoma         | 10.21590049 |
| 636  | 7/26/2018  | 54 | IB | N/A | Caucasian | 41.9   | 448   | serous adenocarcinoma               | 0.21933824  |
| 637  | 8/28/2018  | 68 | IA | G3  | Caucasian | 22.2   | 536   | serous cystadenocarcinoma           | 8.518621348 |
| 638  | 9/20/2018  | 68 | IA | G2  | Caucasian | 27.5   | 684   | mucinous adenocarcinoma             | 14.24535712 |
| 639  | 10/12/2018 | 41 | IA | G2  | Caucasian | 21.1   | 426   | clear cell adenocarcinoma           | 8.86584017  |
| 640  | 11/16/2018 | 55 | IA | G3  | Caucasian | 25.5   | 175   | serous papillary cystadenocarcinoma | 4.830883907 |
| 641  | 11/28/2018 | 59 | IA | G1  | Caucasian | 29.1   | 545.8 | serous adenocarcinoma               | 8.026185398 |
| 1167 | 2/14/2014  | 36 | IA | G1  | Caucasian | 24.2   | 8.2   | endometrioid adenocarcinoma         | 9.54040795  |
| 1168 | 2/17/2014  | 40 | IB | N/A | Caucasian | 31.6   | 80    | serous papillary cystadenocarcinoma | 5.432048408 |
| 1169 | 2/20/2014  | 34 | IA | G3  | Caucasian | 25.6   | 300   | serous adenocarcinoma               | 9.603766294 |
| 1170 | 5/12/2014  | 60 | IA | N/A | Caucasian | 26     | 4.4   | serous papillary cystadenocarcinoma | 8.026512859 |
| 1171 | 5/19/2014  | 57 | IA | G2  | Caucasian | 28.3   | 125   | endometrioid adenocarcinoma         | 8.773548639 |
| 1172 | 7/16/2014  | 38 | IA | N/A | Caucasian | 18.4   | 34.1  | mucinous cystadenocarcinoma         | 10.85233356 |
| 1174 | 10/29/2014 | 38 | IA | G2  | Caucasian | 24.5   | 310   | adenocarcinoma                      | 9.172257038 |
| 1175 | 1/19/2015  | 32 | IB | G2  | Caucasian | 28.121 | 78    | endometrial adenocarcinoma          | 4.564276206 |
| 1177 | 1/22/2015  | 58 | IA | N/A | Caucasian | 43.3   | 105   | borderline mucinous cystadenoma     | 10.54730712 |
| 1178 | 4/21/2015  | 57 | IB | N/A | Caucasian | 26.5   | 280   | serous cystadenocarcinoma           | 4.347765338 |

|      |            |    |    |     |           |        |       |                                    |             |
|------|------------|----|----|-----|-----------|--------|-------|------------------------------------|-------------|
| 1179 | 7/16/2015  | 58 | IA | N/A | Caucasian | 18.4   | 635   | clear cell adenocarcinoma          | 6.263357603 |
| 1181 | 10/22/2015 | 53 | IA | N/A | Caucasian | 38.1   | 59    | serous adenocarcinoma              | 4.658108278 |
| 1182 | 2/11/2016  | 44 | IB | G1  | Caucasian | 27.1   | 335   | endometrioid adenocarcinoma        | -0.42600882 |
| 1183 | 5/18/2016  | 30 | IA | G2  | Caucasian | 22.3   | 182   | endometrioid adenocarcinoma        | 0.758193354 |
| 1185 | 7/14/2016  | 38 | IA | G1  | Caucasian | 20.1   | 156   | mucinous adenocarcinoma            | 9.19812775  |
| 1186 | 7/18/2016  | 48 | IA | G1  | Caucasian | 26.4   | 222   | endometrioid adenocarcinoma        | 9.85245272  |
| 1187 | 9/15/2016  | 47 | IA | G2  | Caucasian | 35.5   | 460   | endometrioid adenocarcinoma        | 5.117771611 |
| 1188 | 9/22/2016  | 43 | IB | G2  | Caucasian | 26.1   | 318   | endometrioid adenocarcinoma        | 8.226584415 |
| 1190 | 4/3/2018   | 43 | IA | G3  | Caucasian | 30.5   | 615   | serous adenocarcinoma              | 5.993258052 |
| 1191 | 12/20/2018 | 31 | IA | G3  | Caucasian | 29     | 761   | mucinous adenocarcinoma            | 9.864559356 |
| 1192 | 7/23/2019  | 37 | IA | G1  | Caucasian | 22.4   | 734   | mucinous cystadenocarcinoma        | 6.510011228 |
| 1193 | 11/7/2019  | 33 | IA | G2  | Caucasian | 27.5   | 125   | serous and mucinous adenocarcinoma | 6.043128401 |
| 1194 | 1/10/2020  | 32 | IB | N/A | Caucasian | 23.1   | 159   | serous cystadenocarcinoma          | 3.170385734 |
| 1195 | 1/16/2020  | 40 | IA | G2  | Caucasian | 23.6   | 104   | endometrioid adenocarcinoma        | 8.116738521 |
| 1196 | 2004       | 52 | 1C | N/A | Caucasian | 21.123 | 31.4  | Clear cell adenocarcinoma , NOS    | 2.788498878 |
| 1197 | 2006       | 48 | 1C | N/A | Caucasian | 20.123 | 4.8   | Endometrioid adenocarcinoma , NOS  | 8.654992328 |
| 1198 | 2006       | 42 | 1C | N/A | Caucasian | 23.123 | 742.1 | Endometrioid adenocarcinoma , NOS  | 10.47973503 |

|      |      |    |    |     |           |        |       |                                                         |             |
|------|------|----|----|-----|-----------|--------|-------|---------------------------------------------------------|-------------|
| 1199 | 2007 | 82 | 1A | N/A | Caucasian | 28.1   | 60.7  | Serous cystadenocarcinoma, NOS (C56.9)                  | 11.58145962 |
| 1200 | 2007 | 80 | 1C | N/A | Caucasian | 24.546 | 54.8  | Serous cystadenocarcinoma, NOS (C56.9)                  | 8.76997229  |
| 1201 | 2007 | 38 | 1A | N/A | Caucasian | 26.727 | 74.2  | Mucinous adenocarcinoma [2018+: USE 8253 FOR LUNG ONLY] | 5.040598254 |
| 1202 | 2007 | 31 | 1C | N/A | Caucasian | 24.267 | 170.5 | Mixed cell adenocarcinoma                               | 5.598694796 |
| 1203 | 2008 | 34 | 1C | N/A | Caucasian | 20.12  | 95.1  | Endometrioid adenocarcinoma, NOS                        | 5.347822156 |
| 1204 | 2009 | 55 | 1C | N/A | Caucasian | 30.132 | 23.5  | Endometrioid adenocarcinoma, NOS                        | 8.871763706 |
| 1205 | 2009 | 43 | 1A | N/A | Caucasian | 21.323 | 30.8  | Papillary serous cystadenocarcinoma (C56.9)             | 2.807437267 |
| 1206 | 2009 | 52 | 1A | N/A | Caucasian | 21.123 | 30.2  | Mixed cell adenocarcinoma                               | 7.436282697 |
| 1207 | 2009 | 53 | 1A | N/A | Caucasian | 23.92  | 17.8  | Clear cell adenocarcinoma, NOS                          | 10.62142939 |
| 1210 | 2010 | 48 | 1C | N/A | Caucasian | 22.156 | 422.9 | Endometrioid adenocarcinoma, NOS                        | 9.423820197 |
| 1211 | 2010 | 50 | 1A | N/A | Caucasian | 38.123 | 209.3 | Endometrioid adenocarcinoma, NOS                        | 7.431840644 |
| 1212 | 2011 | 49 | 1C | N/A | Caucasian | 23.123 | 42.6  | Serous cystadenocarcinoma, NOS (C56.9)                  | 13.49213817 |
| 1213 | 2011 | 58 | 1C | N/A | Caucasian | 30.256 | 987.7 | Endometrioid adenocarcinoma, NOS                        | 13.65810112 |

|      |      |    |    |     |           |        |       |                                                         |             |
|------|------|----|----|-----|-----------|--------|-------|---------------------------------------------------------|-------------|
| 1214 | 2011 | 43 | 1C | N/A | Caucasian | 22.22  | 15.7  | Mixed cell adenocarcinoma                               | 5.029116051 |
| 1215 | 2012 | 45 | 1C | N/A | Caucasian | 26.123 | 117   | Serous cystadenocarcinoma, NOS (C56.9)                  | 13.51821173 |
| 1216 | 2012 | 36 | 1C | N/A | Caucasian | 20.161 | 87.4  | Mixed cell adenocarcinoma                               | 10.16695168 |
| 1217 | 2012 | 53 | 1C | N/A | Caucasian | 20.136 | 264.3 | Endometrioid adenocarcinoma, NOS                        | 10.40151238 |
| 1218 | 2012 | 54 | 1A | N/A | Caucasian | 23.67  | 39.7  | Clear cell adenocarcinoma, NOS                          | 5.651992869 |
| 1219 | 2012 | 50 | 1C | N/A | Caucasian | 22.234 | 11.9  | Granulosa cell tumor, malignant (C56.9)                 | 6.21983444  |
| 1220 | 2013 | 64 | 1A | N/A | Caucasian | 30.156 | 42.2  | Adenocarcinoma, NOS                                     | 5.67654108  |
| 1221 | 2013 | 23 | 1C | N/A | Caucasian | 23.413 | 21.5  | Mixed cell adenocarcinoma                               | 4.579884072 |
| 1222 | 2013 | 46 | 1A | N/A | Caucasian | 24.987 | 312.5 | Carcinoma in situ, NOS                                  | 10.5726707  |
| 1223 | 2013 | 55 | 1A | N/A | Caucasian | 30.123 | 28.6  | Mucinous adenocarcinoma [2018+: USE 8253 FOR LUNG ONLY] | 8.25610064  |
| 1224 | 2013 | 52 | 1A | N/A | Caucasian | 23.87  | 35.6  | Clear cell adenocarcinoma, NOS                          | 7.293433181 |
| 1225 | 2014 | 51 | 1A | N/A | Caucasian | 23.177 | 72    | Clear cell adenocarcinoma, NOS                          | 9.530938721 |
| 1226 | 2014 | 54 | 1C | N/A | Caucasian | 23.098 | 33    | Serous cystadenocarcinoma, NOS (C56.9)                  | 7.561651329 |
| 1227 | 2015 | 47 | 1C | N/A | Caucasian | 22.19  | 42.7  | Endometrioid adenocarcinoma, NOS                        | 5.70997285  |

|      |      |    |    |     |           |        |       |                                                         |             |
|------|------|----|----|-----|-----------|--------|-------|---------------------------------------------------------|-------------|
| 1228 | 2015 | 54 | 1A | N/A | Caucasian | 25.134 | 26.6  | Granulosa cell tumor, malignant (C56.9)                 | 6.191363145 |
| 1229 | 2015 | 35 | 1C | N/A | Caucasian | 24.12  | 99.9  | Serous cystadenocarcinoma, NOS (C56.9)                  | 3.738421336 |
| 1230 | 2015 | 59 | 1A | N/A | Caucasian | 20.12  | 66    | Carcinoid tumor, NOS [including of appendix]            | 11.39296054 |
| 1232 | 2015 | 59 | 1C | N/A | Caucasian | 27.89  | 154.6 | Endometrioid adenocarcinoma, NOS                        | 11.59081696 |
| 1233 | 2015 | 68 | 1C | N/A | Caucasian | 38.123 | 360.9 | Mixed cell adenocarcinoma                               | 12.85172404 |
| 1234 | 2016 | 49 | 1C | N/A | Caucasian | 29.123 | 445.2 | Mixed cell adenocarcinoma                               | 7.358517984 |
| 1235 | 2016 | 56 | 1C | N/A | Caucasian | 22.132 | 31    | Mullerian mixed tumor (C54._)                           | 9.179404568 |
| 1237 | 2016 | 50 | 1A | N/A | Caucasian | 25.32  | 154.6 | Mixed cell adenocarcinoma                               | 6.665184924 |
| 1238 | 2016 | 32 | 1A | N/A | Caucasian | 26.98  | 40.6  | Carcinoma, NOS                                          | 7.797408862 |
| 1240 | 2016 | 70 | 1C | N/A | Caucasian | 23.98  | 37.6  | Endometrioid adenocarcinoma, NOS                        | 5.277322057 |
| 1241 | 2017 | 37 | 1A | N/A | Caucasian | 22.546 | 53    | Endometrioid adenocarcinoma, NOS                        | 4.161103191 |
| 1242 | 2017 | 46 | 1C | N/A | Caucasian | 24.56  | 20.2  | Endometrioid adenocarcinoma, NOS                        | 4.726565532 |
| 1243 | 2017 | 65 | 1A | N/A | Caucasian | 20.345 | 287.1 | Mucinous adenocarcinoma [2018+: USE 8253 FOR LUNG ONLY] | 6.472784353 |
| 1244 | 2017 | 48 | 1C | N/A | Caucasian | 23.67  | 375.9 | Clear cell adenocarcinoma, NOS                          | 4.936102617 |

|      |           |    |    |     |           |        |       |                                                         |             |
|------|-----------|----|----|-----|-----------|--------|-------|---------------------------------------------------------|-------------|
| 1245 | 2018      | 39 | 1A | N/A | Caucasian | 20.345 | 133.1 | Endometrioid adenocarcinoma , NOS                       | 7.163031845 |
| 1246 | 2018      | 64 | 1A | N/A | Caucasian | 22.2   | 44    | Serous surface papillary carcinoma (C56.9)              | 5.428795575 |
| 1247 | 2018      | 65 | 1C | N/A | Caucasian | 30.123 | 22.4  | Endometrioid adenocarcinoma , NOS                       | 12.62470648 |
| 1248 | 2018      | 64 | II | N/A | Caucasian | 23.67  | 22    | Serous surface papillary carcinoma (C56.9)              | 6.874942348 |
| 1249 | 2018      | 64 | 1A | N/A | Caucasian | 23.678 | 283.6 | Carcinoid tumor, NOS [including of appendix]            | 5.970683474 |
| 1250 | 2018      | 66 | 1C | N/A | Caucasian | 19.83  | 29.2  | Endometrioid adenocarcinoma , NOS                       | 6.122300248 |
| 1251 | 2019      | 68 | 1A | N/A | Caucasian | 19.76  | 28.9  | Endometrioid adenocarcinoma , NOS                       | 9.484809807 |
| 1252 | 2019      | 36 | 1A | N/A | Caucasian | 22.12  | 35.6  | Carcinoma, NOS                                          | 3.023429107 |
| 1253 | 2019      | 66 | 1C | N/A | Caucasian | 23.021 | 9.3   | Endometrioid adenocarcinoma , NOS                       | 11.77184697 |
| 1254 | 2019      | 68 | 1C | N/A | Caucasian | 33.13  | 194.4 | Clear cell adenocarcinoma , NOS                         | 10.11637796 |
| 1255 | 2019      | 69 | 1A | N/A | Caucasian | 30.123 | 148.4 | Mucinous adenocarcinoma [2018+: USE 8253 FOR LUNG ONLY] | 5.176856258 |
| 1256 | 2019      | 37 | 1A | N/A | Caucasian | 22.145 | 21.9  | Endometrioid adenocarcinoma , NOS                       | 6.565652785 |
| 1257 | 1/16/2013 | 70 | IA | G3  | Caucasian | 29.2   | 68.4  | endometrioid papillary carcinoma                        | 12.74603879 |
| 1258 | 1/23/2013 | 43 | IA | G1  | Caucasian | 26.1   | 16.7  | endometrioid adenocarcinoma                             | 11.57837386 |



|      |           |    |    |     |           |      |       |                                     |             |
|------|-----------|----|----|-----|-----------|------|-------|-------------------------------------|-------------|
| 1259 | 1/15/2013 | 61 | IA | G2  | Caucasian | 38.6 | 361.4 | endometrial adenocarcinoma          | 10.76632257 |
| 1260 | 2/19/2013 | 43 | IA | G1  | Caucasian | 24.2 | 460   | serous adenocarcinoma               | 8.671528134 |
| 1261 | 2/20/2013 | 44 | IA | N/A | Caucasian | 35.2 | 206   | serous papillary cystadenocarcinoma | 15.7200043  |
| 1262 | 3/13/2013 | 66 | IC | G3  | Caucasian | 28.2 | 130.3 | serous adenocarcinoma               | 12.89250415 |
| 1263 | 3/15/2013 | 54 | IC | G1  | Caucasian | 25.2 | 150   | serous papillary adenocarcinoma     | 14.5307148  |
| 1264 | 3/19/2013 | 61 | IA | N/A | Caucasian | 34.7 | 529.5 | serous adenocarcinoma               | 11.66430172 |
| 1265 | 3/27/2013 | 58 | IA | G1  | Caucasian | 25.4 | 45    | clear cell carcinoma                | 14.68499732 |
| 1266 | 4/9/2013  | 36 | IA | N/A | Caucasian | 45.7 | 22.6  | serous papillary cystadenocarcinoma | 11.16934507 |
| 1267 | 4/9/2013  | 33 | IB | N/A | Caucasian | 19.1 | 19.5  | serous cystadenocarcinoma           | 9.573755784 |
| 1268 | 5/6/2013  | 53 | IB | G1  | Caucasian | 27.7 | 360   | endometrioid adenocarcinoma         | 9.655210964 |
| 1269 | 5/15/2013 | 49 | IC | G3  | Caucasian | 35.3 | 42.7  | endometrioid adenocarcinoma         | 15.70329735 |
| 1270 | 5/16/2013 | 39 | IA | N/A | Caucasian | 31.2 | 41    | serous papillary cystadenocarcinoma | 6.249868822 |
| 1271 | 7/18/2013 | 30 | IB | N/A | Caucasian | 32.7 | 29    | serous papillary cystadenocarcinoma | 9.282153644 |
| 1272 | 7/23/2013 | 52 | IA | N/A | Caucasian | 29.2 | 179.5 | serous papillary cystadenocarcinoma | 14.64084587 |
| 1273 | 8/9/2013  | 50 | IA | N/A | Caucasian | 31.6 | 97    | serous papillary cystadenocarcinoma | 11.15029862 |
| 1274 | 9/18/2013 | 34 | IB | N/A | Caucasian | 36.7 | 275   | serous papillary cystadenocarcinoma | 10.96465658 |
| 1275 | 11/1/2013 | 47 | IB | G2  | Caucasian | 23.2 | 200   | serous adenocarcinoma               | 11.40248233 |
| 1276 | 1/22/2014 | 81 | IA | G1  | Caucasian | 21.5 | 130.4 | mucinous adenocarcinoma             | 14.21085068 |
| 1277 | 2/13/2014 | 77 | IA | G2  | Caucasian | 33.5 | 156.5 | mucinous cystadenocarcinoma         | 11.73404638 |

|      |            |    |    |      |           |      |      |                                       |             |
|------|------------|----|----|------|-----------|------|------|---------------------------------------|-------------|
| 1278 | 2/24/2014  | 63 | IC | N/A  | Caucasian | 29   | 37   | serous papillary adenocarcinoma       | 6.842636806 |
| 1279 | 7/14/2014  | 23 | IA | N/A  | Caucasian | 21.1 | 34.7 | borderline mucinous cystadenoma       | 7.379816885 |
| 1280 | 11/18/2014 | 19 | IA | N/A  | Caucasian | 22.3 | 528  | mucinous cystadenocarcinoma           | 7.83478904  |
| 1281 | 12/3/2014  | 61 | IA | N/A  | Caucasian | 20.4 | 340  | clear cell adenocarcinoma             | 6.153655246 |
| 1282 | 2/10/2015  | 61 | IA | N/A  | Caucasian | 27   | 180  | mucinous papillary cystadenocarcinoma | 14.47804858 |
| 1283 | 3/31/2015  | 69 | IA | N/A  | Caucasian | 31.6 | 250  | clear cell adenocarcinoma             | 11.51788529 |
| 1284 | 5/11/2016  | 67 | IB | G2   | Caucasian | 38   | 268  | endometrioid adenocarcinoma           | 8.20219839  |
| 1285 | 5/12/2016  | 61 | IA | G1   | Caucasian | 35.8 | 186  | endometrioid adenocarcinoma           | 4.716011233 |
| 1286 | 9/14/2016  | 64 | IA | G3   | Caucasian | 26.3 | 620  | serous adenocarcinoma                 | 3.357054771 |
| 1287 | 9/15/2016  | 64 | IC | G2   | Caucasian | 26   | 890  | serous adenocarcinoma                 | 17.02356334 |
| 1288 | 6/21/2018  | 67 | IB | G1   | Caucasian | 26.8 | 454  | endometrioid adenocarcinoma           | 7.674397385 |
| 1289 | 1/30/2014  | 48 | IB | G2   | Caucasian | 20.6 | 246  | serous papillary adenocarcinoma       | -1.80580665 |
| 1290 | 2/14/2014  | 36 | IA | G1   | Caucasian | 24.2 | 7.5  | endometrioid adenocarcinoma           | 8.748813012 |
| 1291 | 2/17/2014  | 40 | IB | N/A  | Caucasian | 31.6 | 80   | serous papillary cystadenocarcinoma   | 9.644806163 |
| 1292 | 2/20/2014  | 34 | IA | G3   | Caucasian | 25.6 | 300  | serous adenocarcinoma                 | 14.50169157 |
| 1293 | 2/28/2014  | 33 | IC | G2-3 | Caucasian | 22.3 | 760  | serous papillary adenocarcinoma       | 15.33574064 |
| 1294 | 3/17/2014  | 48 | IB | N/A  | Caucasian | 26.2 | 10   | serous adenocarcinoma                 | 15.09252157 |
| 1295 | 3/24/2014  | 40 | IB | N/A  | Caucasian | 23.2 | 43.1 | serous adenocarcinoma                 | 12.85136854 |

|      |            |    |    |     |           |        |      |                                          |             |
|------|------------|----|----|-----|-----------|--------|------|------------------------------------------|-------------|
| 1296 | 5/12/2014  | 60 | IA | N/A | Caucasian | 26     | 6.4  | serous papillary<br>cystadenocarcinoma   | 13.08597609 |
| 1297 | 5/19/2014  | 57 | IA | G2  | Caucasian | 28.3   | 125  | endometrioid<br>adenocarcinoma           | 15.20869577 |
| 1298 | 7/9/2014   | 42 | IB | N/A | Caucasian | 23.1   | 814  | serous papillary<br>cystadenocarcinoma   | 13.38040516 |
| 1299 | 7/16/2014  | 38 | IA | N/A | Caucasian | 18.4   | 37.3 | mucinous<br>cystadenocarcinoma           | 13.89340448 |
| 1300 | 10/29/2014 | 38 | IA | G2  | Caucasian | 24.5   | 310  | adenocarcinoma                           | 14.84820033 |
| 1301 | 1/19/2015  | 32 | IB | G2  | Caucasian | 29.631 | 78   | endometrial<br>adenocarcinoma            | 10.46204467 |
| 1302 | 1/22/2015  | 58 | IA | N/A | Caucasian | 43.3   | 105  | borderline<br>mucinous<br>cystadenoma    | 17.54864371 |
| 1303 | 7/16/2015  | 58 | IA | N/A | Caucasian | 18.4   | 635  | clear cell<br>adenocarcinoma             | 11.96154494 |
| 1304 | 10/22/2015 | 53 | IA | N/A | Caucasian | 38.1   | 59   | serous<br>adenocarcinoma                 | 11.34358342 |
| 1305 | 5/18/2016  | 30 | IA | G2  | Caucasian | 22.3   | 182  | endometrioid<br>adenocarcinoma           | 5.352977397 |
| 1306 | 7/18/2016  | 48 | IA | G1  | Caucasian | 26.4   | 222  | endometrioid<br>adenocarcinoma           | 9.077638113 |
| 1307 | 9/22/2016  | 43 | IB | G2  | Caucasian | 26.1   | 318  | endometrioid<br>adenocarcinoma           | 5.826146466 |
| 1309 | 4/3/2018   | 43 | IA | G3  | Caucasian | 30.5   | 615  | serous<br>adenocarcinoma                 | 9.739455577 |
| 1310 | 12/20/2018 | 31 | IA | G3  | Caucasian | 29     | 761  | mucinous<br>adenocarcinoma               | 12.21517924 |
| 1311 | 7/23/2019  | 37 | IA | G1  | Caucasian | 22.4   | 734  | mucinous<br>cystadenocarcinoma           | 10.5279247  |
| 1312 | 11/7/2019  | 33 | IA | G2  | Caucasian | 27.5   | 125  | serous and<br>mucinous<br>adenocarcinoma | 2.428215384 |
| 1313 | 1/10/2020  | 32 | IB | N/A | Caucasian | 23.1   | 159  | serous<br>cystadenocarcinoma             | 5.490967653 |
| 1314 | 1/16/2020  | 40 | IA | G2  | Caucasian | 23.6   | 104  | endometrioid<br>adenocarcinoma           | 11.04065689 |

| 1315   | 12/15/2014         | 81  | IC    | N/A   | Caucasian   | 24.12  | 20.1         | Poorly differentiated carcinoma with focal endometrioid differentiation of R ovary | 8.795080567     |
|--------|--------------------|-----|-------|-------|-------------|--------|--------------|------------------------------------------------------------------------------------|-----------------|
| 1316   | 5/9/2017           | 61  | IA    |       | Caucasian   | 28.123 | 228.9        | Mucinous borderline tumor, grade 1 (no invasion) of R ovary                        | 9.993439062     |
| 1317   | 4/15/2019          | 65  | I     |       | Caucasian   | 28.123 | 23           | Serous carcinoma of L ovary                                                        | 7.950979389     |
| Lab ID | Date of collection | Age | Stage | Grade | Ethnicity   | BMI    | CA 125, U/mL | Histological diagnosis                                                             | Oncoveryx score |
| 5378   | 17-May-22          | 66  | II    | II    | South Asian | 27.289 | 7.7          | Histopathology                                                                     | 7.215851771     |
| 5379   | 19-May-22          | 40  | III   | II    | South Asian | 27.056 | 20.9         | Histopathology                                                                     | 9.18095085      |
| 5380   | 20-May-22          | 43  | III   | II    | South Asian | 26.33  | 27.5         | Histopathology                                                                     | 5.504482874     |
| 5381   | 23-May-22          | 85  | IV    | II    | South Asian | 21.833 | 11.3         | Histopathology                                                                     | 8.705492826     |
| 5384   | 26-May-22          | 50  | III   | II    | South Asian | 26.901 | 11.3         | Histopathology                                                                     | 9.058377108     |
| 5385   | 26-May-22          | 55  | IV    | II    | South Asian | 23.794 | 3.29         | Histopathology                                                                     | 16.56011641     |
| 5386   | 11-Jul-22          | 65  | IV    | II    | South Asian | 23.618 | 26.4         | Histopathology                                                                     | 5.768057341     |
| 5830   | 6/14/2022          | 60  | II    | II    | South Asian | 21.4   | >1000.0      | Histopathology                                                                     | 14.37306909     |
| 5831   | 6/17/2022          | 60  | IV    | III   | South Asian | 17.4   | 8.9          | Histopathology                                                                     | 13.89483693     |
| 5832   | 6/23/2022          | 55  | IV    | III   | South Asian | 19.4   | 65           | Histopathology                                                                     | 12.41031843     |
| 5833   | 6/28/2022          | 57  | IV    | III   | South Asian | 16.7   | 179.3        | Histopathology                                                                     | 10.32710489     |
| 5834   | 7/25/2022          | 34  | III   | III   | South Asian | 17.6   | 13.5         | Histopathology                                                                     | 9.565734245     |
| 5835   | 7/25/2022          | 61  | IV    | III   | South Asian | 20.2   | 8            | Histopathology                                                                     | 8.731689214     |
| 5836   | 7/25/2022          | 40  | IIA   | III   | South Asian | 17.7   | 13.4         | Histopathology                                                                     | 2.408761618     |
| 5837   | 7/25/2022          | 53  | III   | III   | South Asian | 21.5   | 8.5          | Histopathology                                                                     | 4.898368474     |

|      |           |    |      |     |             |        |       |                |             |
|------|-----------|----|------|-----|-------------|--------|-------|----------------|-------------|
| 5838 | 7/25/2022 | 42 | III  | I   | South Asian | 17.4   | 7.9   | Histopathology | 11.9807129  |
| 5839 | 7/25/2022 | 52 | IV   | III | South Asian | 17.6   | 11.1  | Histopathology | 10.90628739 |
| 5840 | 7/25/2022 | 35 | IIA  | I   | South Asian | 17.6   | 19.2  | Histopathology | 6.585605343 |
| 5841 | 7/25/2022 | 40 | IIB  | I   | South Asian | 18.4   | 8.4   | Histopathology | 4.650361152 |
| 5842 | 7/25/2022 | 49 | III  | II  | South Asian | 19.4   | 5.4   | Histopathology | 3.572741976 |
| 5843 | 7/28/2022 | 54 | IV   | II  | South Asian | 21.5   | 7.6   | Histopathology | 8.081349718 |
| 5844 | 7/28/2022 | 43 | III  | II  | South Asian | 22.3   | 15    | Histopathology | 6.430041699 |
| 5845 | 7/28/2022 | 60 | IIIC | III | South Asian | 19.1   | 6     | Histopathology | 3.289638105 |
| 5846 | 7/28/2022 | 34 | IV   | III | South Asian | 16.7   | 14    | Histopathology | 2.430196494 |
| 5847 | 7/28/2022 | 53 | II   | I   | South Asian | 21.2   | 6.9   | Histopathology | 6.562491391 |
| 5848 | 7/28/2022 | 45 | II   | I   | South Asian | 14.9   | 6.9   | Histopathology | 5.729136933 |
| 5849 | 7/28/2022 | 39 | III  | II  | South Asian | 16.3   | 6.8   | Histopathology | 3.662363263 |
| 5850 | 7/28/2022 | 43 | IIIA | I   | South Asian | 19.1   | 8     | Histopathology | 3.749186431 |
| 5851 | 7/28/2022 | 40 | IIB  | III | South Asian | 18.6   | 10.1  | Histopathology | 3.955921763 |
| 5852 | 7/30/2022 | 51 | IIIA | II  | South Asian | 16.4   | 9.3   | Histopathology | 9.958280683 |
| 5853 | 8/1/2022  | 21 | IIB  |     | South Asian | 18.4   | 11.4  | Histopathology | 6.348825593 |
| 5854 | 8/1/2022  | 69 | III  | I   | South Asian | 20.8   | 9.4   | Histopathology | 15.4338311  |
| 6104 | 6/4/2022  | 60 | III  | II  | South Asian | 27.055 | 105.4 | Histopathology | 9.998471334 |
| 6105 | 6/20/2022 | 55 | III  | II  | South Asian | 27.276 | 196.1 | Histopathology | 13.07606328 |
| 6106 | 6/23/2022 | 54 | III  | II  | South Asian | 20.825 | 774.5 | Histopathology | 17.07483223 |
| 6107 | 6/30/2022 | 50 | III  | I   | South Asian | 27.268 | 14.1  | Histopathology | 15.5597077  |
| 6108 | 7/7/2022  | 22 | II   | II  | South Asian | 29.333 | 19.8  | Histopathology | 9.09185853  |
| 6109 | 7/29/2022 | 55 | II   | I   | South Asian | 25.104 | 722.3 | Histopathology | 9.192065945 |

|      |            |    |     |     |             |        |         |                                                                                                    |             |
|------|------------|----|-----|-----|-------------|--------|---------|----------------------------------------------------------------------------------------------------|-------------|
| 6110 | 8/6/2022   | 46 | III | II  | South Asian | 25.452 | 27.6    | Histopathology                                                                                     | 11.21964623 |
| 6111 | 6/1/2022   | 40 | II  | I   | South Asian | 23.052 | 74.8    | USG                                                                                                | 4.958295941 |
| 6112 | 6/1/2022   | 70 | I   | II  | South Asian | 26.438 | 70.1    | USG                                                                                                | 2.259444084 |
| 6113 | 27/06/2022 | 55 | II  | I   | South Asian | 20.195 | 134.5   | CT                                                                                                 | 11.07095706 |
| 6114 | 07/05/22   | 25 | II  | I   | South Asian | 20.109 | 158     | Histopathology                                                                                     | 13.64845527 |
| 6115 | 07/25/22   | 64 | II  | I   | South Asian | 24.498 | 12.3    | Histopathology                                                                                     | 12.94465947 |
| 6116 | 07/25/22   | 55 | IIA | I   | South Asian | 22.8   | 14.7    | Histopathology                                                                                     | 25.45349225 |
| 6117 | 07/25/22   | 45 | II  | I   | South Asian | 20.91  | 10.7    | Histopathology                                                                                     | 17.34624476 |
| 6118 | 07/28/22   | 69 | II  | I   | South Asian | 20.613 | 65.7    | Histopathology                                                                                     | 12.16841387 |
| 7005 | 23-Jun-22  | 50 | III | II  | South Asian | 20     | 110.7   | x-Ray Chest PA View, CT Abdomen & Pelvis (Plain+ Contrast), Ultrasound Whole Abdomen.              | 24.9850833  |
| 7006 | 29-Jun-22  | 67 | II  | II  | South Asian | 25.1   | 11.5    | x-Ray Chest PA View, CT Abdomen & Pelvis (Plain+ Contrast), Ultrasonography Abdomen, Biopsy Report | 20.03211537 |
| 7007 | 12-Jul-22  | 56 | III | I   | South Asian | 39.5   | 14.3    | x-Ray Chest PA View, Ultrasonography Abdomen, Biopsy Report                                        | 15.94752282 |
| 7008 | 12-Aug-22  | 51 | III | III | South Asian | 24.5   | >1000.0 | Cytopathology Report, X-Ray Chest, CT Chest (Plain+ Contrast) & Ultrasonography Abdomen            | 13.70794977 |

|      |           |    |     |     |             |      |         |                                                                                                    |             |
|------|-----------|----|-----|-----|-------------|------|---------|----------------------------------------------------------------------------------------------------|-------------|
| 7009 | 12-Aug-22 | 42 | II  | III | South Asian | 27.5 | 140.4   | FDG PET-CT Scan                                                                                    | 18.51715059 |
| 7010 | 24-Aug-22 | 58 | III | III | South Asian | 24.7 | 72.7    | Cytopathology Report, X-Ray Chest, CT Chest (Plain+ Contrast) & Ultrasonography Abdomen            | 19.19790053 |
| 7011 | 3-Sep-22  | 44 | III | II  | South Asian | 21   | >1000.0 | x-Ray Chest PA View, Ultrasonography Abdomen, Biopsy Report                                        | 18.90278501 |
| 7012 | 3-Sep-22  | 51 | III | I   | South Asian | 24.1 | 12.1    | BIOPSY REPORT, FED PET CT SCAN                                                                     | 21.5381403  |
| 7013 | 3-Sep-22  | 56 | II  | III | South Asian | 24.4 | 214.2   | BIOPSY REPORT, FED PET CT SCAN                                                                     | 24.1221291  |
| 7014 | 3-Sep-22  | 61 | II  | III | South Asian | 24.3 | >1000.0 | FDG PET-CT Scan                                                                                    | 21.05148808 |
| 7015 | 3-Sep-22  | 38 | III | I   | South Asian | 25.4 | >1000.0 | Cytopathology Report, X-Ray Chest, CT Chest (Plain+ Contrast) & Ultrasonography Abdomen            | 23.1757094  |
| 7016 | 3-Sep-22  | 66 | III | III | South Asian | 24.4 | 6.3     | x-Ray Chest PA View, CT Abdomen & Pelvis (Plain+ Contrast), Ultrasonography Abdomen, Biopsy Report | 12.62172457 |
| 7017 | 5-Sep-22  | 60 | II  | III | South Asian | 26.1 | 714.1   | BIOPSY REPORT, FED PET CT SCAN                                                                     | 22.03257999 |
| 7018 | 6-Sep-22  | 65 | II  | I   | South Asian | 25.6 | 10.6    | x-Ray Chest PA View, Ultrasonography Abdomen, Biopsy Report                                        | 17.89175361 |
| 7019 | 6-Sep-22  | 56 | III | II  | South Asian | 25.2 | 4.1     | FDG PET-CT Scan                                                                                    | 20.74782538 |

|      |           |    |     |     |             |      |         |                                                                                         |             |
|------|-----------|----|-----|-----|-------------|------|---------|-----------------------------------------------------------------------------------------|-------------|
| 7020 | 6-Sep-22  | 53 | II  | III | South Asian | 27.6 | >1000.0 | BIOPSY REPORT,FED PET CT SCAN                                                           | 20.38654251 |
| 7021 | 6-Sep-22  | 50 | III | I   | South Asian | 25.8 | 35.6    | Cytopathology Report, X-Ray Chest, CT Chest (Plain+ Contrast) & Ultrasonography Abdomen | 17.06629971 |
| 7022 | 6-Sep-22  | 75 | II  | I   | South Asian | 25.3 | 5.3     | x-Ray Chest PA View, Ultrasonography Abdomen, Biopsy Report                             | 14.71329651 |
| 7023 | 6-Sep-22  | 71 | III | III | South Asian | 23   | 5.7     | x-Ray Chest PA View, Ultrasonography Abdomen, Biopsy Report                             | 12.94638969 |
| 7024 | 7-Sep-22  | 32 | II  | III | South Asian | 17.8 | >1000.0 | BIOPSY REPORT,FED PET CT SCAN                                                           | 21.57686773 |
| 7025 | 8-Sep-22  | 60 | II  | II  | South Asian | 24.1 | 9.5     | FDG PET-CT Scan                                                                         | 19.50264728 |
| 7026 | 8-Sep-22  | 50 | III | III | South Asian | 24.9 | 13.2    | x-Ray Chest PA View, Ultrasonography Abdomen, Biopsy Report                             | 10.28381523 |
| 7027 | 9-Sep-22  | 50 | II  | III | South Asian | 24.3 | 8.1     | FDG PET-CT Scan                                                                         | 19.13555275 |
| 7028 | 10-Sep-22 | 42 | III | I   | South Asian | 22.1 | 101.9   | Cytopathology Report, X-Ray Chest, CT Chest (Plain+ Contrast) & Ultrasonography Abdomen | 21.99451156 |
| 7029 | 10-Sep-22 | 56 | II  | III | South Asian | 25.2 | 5.4     | x-Ray Chest PA View, Ultrasonography Abdomen, Biopsy Report                             | 19.16342618 |
| 7030 | 10-Sep-22 | 50 | III | II  | South Asian | 23   | 156.8   | BIOPSY REPORT,FED PET CT SCAN                                                           | 22.92416767 |



|      |           |    |     |     |             |        |         |                                                                                         |             |
|------|-----------|----|-----|-----|-------------|--------|---------|-----------------------------------------------------------------------------------------|-------------|
| 7031 | 13-Sep-22 | 54 | II  | II  | South Asian | 23.5   | 23.2    | Cytopathology Report, X-Ray Chest, CT Chest (Plain+ Contrast) & Ultrasonography Abdomen | 18.30218729 |
| 7032 | 13-Sep-22 | 31 | II  | II  | South Asian | 22.3   | 5.9     | x-Ray Chest PA View, Ultrasonography Abdomen, Biopsy Report                             | 16.93328347 |
| 7033 | 14-Sep-22 | 45 | III | II  | South Asian | 24.4   | 669.1   | BIOPSY REPORT, FED PET CT SCAN                                                          | 13.2506916  |
| 7034 | 20-Sep-22 | 36 | II  | I   | South Asian | 24.5   | 16.6    | x-Ray Chest PA View, Ultrasonography Abdomen, Biopsy Report                             | 23.94485616 |
| 7035 | 20-Sep-22 | 62 | II  | III | South Asian | 23.3   | 22.4    | FDG PET-CT Scan                                                                         | 7.426578456 |
| 7036 | 21-Sep-22 | 54 | III | II  | South Asian | 24.6   | 5.8     | BIOPSY REPORT, FED PET CT SCAN                                                          | 8.784625684 |
| 7037 | 21-Sep-22 | 43 | III | II  | South Asian | 24.5   | 10.8    | Cytopathology Report, X-Ray Chest, CT Chest (Plain+ Contrast) & Ultrasonography Abdomen | 17.86812722 |
| 7038 | 22-Sep-22 | 67 | II  | III | South Asian | 23.6   | >1000.0 | Ultrasonography Abdomen, Biopsy Report                                                  | 15.25959163 |
| 7039 | 22-Sep-22 | 54 | III | III | South Asian | 24.1   | 8.1     | x-Ray Chest PA View, Ultrasonography Abdomen, Biopsy Report                             | 13.90599819 |
| 7040 | 23-Sep-22 | 41 | III | III | South Asian | 30.283 | 7.9     | SURGICAL PATHOLOGY                                                                      | 15.79604379 |
| 7041 | 26-Sep-22 | 46 | III | II  | South Asian | 20.12  | 7.4     | Ultrasonography Abdomen, Biopsy Report                                                  | 14.08900648 |

|      |           |    |     |     |             |        |         |                |             |
|------|-----------|----|-----|-----|-------------|--------|---------|----------------|-------------|
| 7203 | 08/11/22  | 51 | IV  | III | South Asian | 22.058 | 155.1   | Histopathology | 15.08988565 |
| 7204 | 08/25/22  | 42 | III | II  | South Asian | 20.386 | 67.4    | Histopathology | 17.63826752 |
| 7205 | 08/30/22  | 75 | I   |     | South Asian | 20.08  | 14.6    | Histopathology | 13.73115067 |
| 7206 | 09/09/22  | 44 | IV  | III | South Asian | 20.51  | >1000.0 | Histopathology | 15.84221305 |
| 7207 | 09/13/22  | 42 | III | III | South Asian | 20.005 | 4.2     | Histopathology | 13.07997437 |
| 7208 | 09/14/22  | 28 | I   | I   | South Asian | 21.36  | 8.6     | Histopathology | 11.45911948 |
| 7360 | 10/8/2021 | 27 | II  | I   | South Asian | 19.2   | 20.3    | Histopathology | 1.982748109 |
| 7361 | 3/8/2022  | 40 | II  | I   | South Asian | 21.2   | 100.6   | Histopathology | 5.272660483 |
| 7362 | 4/8/2022  | 53 | II  | II  | South Asian | 22.7   | 19.8    | Histopathology | -1.59098964 |
| 7363 | 8/8/2022  | 66 | II  | I   | South Asian | 18.9   | 8.2     | Histopathology | 5.548659506 |
| 7364 | 8/8/2022  | 42 | II  | II  | South Asian | 22.8   | 6.94    | Histopathology | 5.168220952 |
| 7365 | 8/8/2022  | 58 | II  | II  | South Asian | 18     | 29      | Histopathology | 5.071852173 |
| 7366 | 18-Aug-22 | 42 | II  | I   | South Asian | 21.1   | 514.4   | Histopathology | 3.583132319 |
| 7367 | 2-Sep-22  | 46 | II  | II  | South Asian | 21.6   | 21.3    | Histopathology | 0.523762697 |
| 7368 | 4-Sep-22  | 56 | II  | II  | South Asian | 19.8   | 26.4    | Histopathology | 3.955591536 |
| 7369 | 5-Sep-22  | 58 | II  | I   | South Asian | 23     | 140.6   | Histopathology | 1.895228386 |
| 7370 | 8-Sep-22  | 53 | II  | II  | South Asian | 20.1   | 15.7    | Histopathology | 1.365442942 |
| 7371 | 8-Sep-22  | 55 | II  | II  | South Asian | 23.2   | 27.2    | Histopathology | 1.160426187 |
| 7522 | 9/29/2022 | 45 | III | II  | South Asian | 21.8   | 17.5    | Histopathology | 4.220329624 |
| 7523 | 9/30/2022 | 48 | II  | I   | South Asian | 20.6   | 254.7   | Histopathology | 2.38925685  |
| 7602 | 25-Nov-22 | 42 | II  | I   | South Asian | 20.5   | 35.5    | Histopathology | 7.197483534 |
| 7603 | 26-Nov-22 | 53 | II  | I   | South Asian | 20.4   | 17.1    | Histopathology | 1.699008104 |
| 7734 | 8/24/2022 | 56 | III | II  | South Asian | 20.546 | 47.6    | HP             | 4.610091537 |

|      |            |    |     |     |             |        |         |                 |             |
|------|------------|----|-----|-----|-------------|--------|---------|-----------------|-------------|
| 7735 | 9/13/2022  | 37 | II  | I   | South Asian | 23.725 | 17      | USG-HP          | 10.59106934 |
| 7736 | 9/16/2022  | 42 | III | II  | South Asian | 24.444 | 39.6    | HP              | 3.629406345 |
| 7737 | 10/1/2022  | 68 | II  | I   | South Asian | 23.92  | 6.6     | HP              | 0.518299139 |
| 8083 | 24/11/2022 | 59 | III | II  | South Asian | 21.988 | >1000.0 | USG-HP          | 1.9532806   |
| 8084 | 21/12/2022 | 83 | I   | I   | South Asian | 20.59  | 37.2    | HISTOPATH       | 1.909991383 |
| 8085 | 27/12/2022 | 72 | II  | III | South Asian | 22.031 | 13.1    | FDG PET-CT Scan | 2.17525368  |
| 8086 | 02-01-23   | 48 | II  | III | South Asian | 21.952 | >1000.0 | HISTOPATH       | 5.234583803 |
| 8087 | 09-01-23   | 31 | III | I   | South Asian | 21.952 | 80.4    | HISTOPATH       | 5.742593541 |
| 8088 | 18/01/2023 | 42 | III | II  | South Asian | 22.916 | >1000.0 | USG-HP          | 4.055513235 |
| 8089 | 11-01-23   | 24 | I   | I   | South Asian | 19.829 | 4.5     | HISTOPATH       | 5.518521835 |
| 8647 | 03.05.2021 | 39 | II  | II  | South Asian | 25.403 | 172.7   | FDG PET-CT Scan | 4.10513668  |
| 8648 | 10.05.2021 | 67 | II  | I   | South Asian | 27.125 | 13.2    | HISTOPATH       | -0.84052821 |
| 8658 | 20.06.2021 | 45 | II  | I   | South Asian | 25.354 | 12.3    | HISTOPATH       | 7.147730591 |
| 8660 | 22.06.2021 | 53 | II  | I   | South Asian | 28.742 | 11.6    | HISTOPATH       | 2.108238816 |
| 8661 | 24.06.2021 | 38 | III | II  | South Asian | 30.071 | 11.2    | USG-HP          | 7.326444144 |
| 8662 | 25.06.2021 | 42 | IV  | III | South Asian | 30.083 | 21.3    | HISTOPATH       | 5.978257424 |
| 8663 | 29.06.2021 | 40 | II  | I   | South Asian | 23.681 | 10.2    | FDG PET-CT Scan | 2.400029389 |
| 8664 | 29.06.2021 | 38 | II  | III | South Asian | 25     | 9.6     | HISTOPATH       | 2.487412951 |
| 8665 | 07.07.2021 | 40 | II  | II  | South Asian | 23.84  | 8.7     | USG-HP          | 1.873994949 |
| 8667 | 07.07.2021 | 42 | II  | II  | South Asian | 19.681 | 153     | HISTOPATH       | 2.361009979 |
| 8668 | 07.07.2021 | 65 | II  | IV  | South Asian | 22.773 | 8.7     | HISTOPATH       | 3.234929934 |
| 8669 | 07.07.2021 | 40 | I   | I   | South Asian | 20.717 | 3       | HISTOPATH       | 3.918817159 |
| 8672 | 18.07.2021 | 55 | III | I   | South Asian | 25.833 | 19.5    | HISTOPATH       | 7.651900487 |

|      |            |    |     |    |             |        |      |                               |             |
|------|------------|----|-----|----|-------------|--------|------|-------------------------------|-------------|
| 8673 | 20.07.2021 | 47 | II  | I  | South Asian | 25.314 | 7.7  | HISTOPATH                     | 2.34466176  |
| 8674 | 20.07.2021 | 38 | II  | I  | South Asian | 24.58  | 16.5 | FDG PET-CT Scan               | 5.954621348 |
| 8675 | 20.07.2021 | 59 | III | II | South Asian | 34.731 | 8.6  | HISTOPATH                     | 11.68135712 |
| 8677 | 22.07.2021 | 40 | III | I  | South Asian | 30.139 | 7.7  | HISTOPATH                     | 6.30184017  |
| 8678 | 22.07.2021 | 35 | III | I  | South Asian | 28.326 | 18.3 | FDG PET-CT Scan               | 2.266883907 |
| 8679 | 22.07.2021 | 60 | II  |    | South Asian | 23.846 | 10.8 | HISTOPATH                     | 5.462185398 |
| 8680 | 22.07.2021 | 70 | IV  | I  | South Asian | 24.49  | 7.9  | BIOPSY REPORT,FED PET CT SCAN | 6.97640795  |
| 8683 | 27.07.2021 | 50 | III | II | South Asian | 30.41  | 4.5  | HISTOPATH                     | 2.868048408 |
| 8684 | 27.07.2021 | 29 | II  | I  | South Asian | 28.742 | 3.9  | FDG PET-CT Scan               | 7.039766294 |
| 8685 | 27.07.2021 | 50 | III | II | South Asian | 22.177 | 3.5  | BIOPSY REPORT,FED PET CT SCAN | 5.462512859 |
| 8686 | 27.07.2021 | 27 | III | II | South Asian | 28.567 | 10   | FDG PET-CT Scan               | 6.209548639 |
| 8687 | 27.07.2021 | 46 | II  | I  | South Asian | 24.552 | 17.8 | BIOPSY REPORT,FED PET CT SCAN | 8.28833356  |
| 8688 | 29.07.2021 | 90 | III | II | South Asian | 26.243 | 16   | BIOPSY REPORT,FED PET CT SCAN | 11.17323675 |
| 8690 | 29.07.2021 | 47 | II  | I  | South Asian | 23.841 | 9.2  | Histopathology                | 6.608257038 |
| 8691 | 29.07.2021 | 49 | III | I  | South Asian | 21.479 | 10.7 | BIOPSY REPORT,FED PET CT SCAN | 2.000276206 |
| 8692 | 29.07.2021 | 55 | II  | I  | South Asian | 28.226 | 7.5  | BIOPSY REPORT,FED PET CT SCAN | 4.127187566 |
| 8695 | 31.07.2021 | 52 | I   | I  | South Asian | 27.556 | 11.7 | Histopathology                | 7.983307116 |
| 8696 | 31.07.2021 | 47 | II  | I  | South Asian | 28.508 | 18   | BIOPSY REPORT,FED PET CT SCAN | 1.783765338 |
| 8697 | 31.07.2021 | 47 | III | I  | South Asian | 23.841 | 2.2  | BIOPSY REPORT,FED PET CT SCAN | 3.699357603 |

|      |            |    |     |     |             |        |         |                               |             |
|------|------------|----|-----|-----|-------------|--------|---------|-------------------------------|-------------|
| 8699 | 31.07.2021 | 45 | II  | II  | South Asian | 24.194 | 2.3     | FDG PET-CT Scan               | 4.18435453  |
| 8700 | 01.08.2021 | 50 | II  | I   | South Asian | 24.213 | 11.4    | Histopathology                | 2.094108278 |
| 8701 | 01.08.2021 | 40 | III |     | South Asian | 28.118 | 23.6    | BIOPSY REPORT,FED PET CT SCAN | 2.990008823 |
| 8702 | 01.08.2021 | 60 | II  |     | South Asian | 32.075 | 5.9     | Histopathology                | 2.015884072 |
| 8703 | 01.08.2021 | 64 | III |     | South Asian | 21.118 | 6.2     | HISTOPATH                     | 3.369632025 |
| 8860 | 2/17/2023  | 45 | IIB |     | South Asian | 19.724 | 34.5    | Histopathology                | 6.63412775  |
| 8861 | 2/17/2023  | 68 | I   |     | South Asian | 21.926 | 471.6   | Histopathology                | 7.28845272  |
| 8862 | 2/17/2023  | 56 | IIA | I   | South Asian | 19.436 | 11.5    | Histopathology                | 2.553771611 |
| 8863 | 2/18/2023  | 46 | IIA |     | South Asian | 20.173 | 27.8    | Histopathology                | 5.662584415 |
| 8864 | 2/20/2023  | 34 | IIB | I   | South Asian | 17.528 | >1000.0 | Histopathology                | 4.815633766 |
| 8865 | 2/20/2023  | 51 | I   |     | South Asian | 24.558 | 406.6   | Histopathology                | 3.429258052 |
| 8866 | 2/20/2023  | 57 | I   |     | South Asian | 23.422 | 9.8     | Histopathology                | 7.300559356 |
| 8867 | 2/20/2023  | 35 | IIB |     | South Asian | 17.361 | 66.5    | Histopathology                | 3.946011228 |
| 8868 | 2/21/2023  | 47 | II  |     | South Asian | 20.029 | 10.2    | Histopathology                | 3.479128401 |
| 8870 | 2/21/2023  | 73 | IIA | I   | South Asian | 18.443 | 31.5    | Histopathology                | 5.552738521 |
| 8871 | 2/25/2023  | 61 | I   | III | South Asian | 21.504 | 9.6     | Histopathology                | 0.224498878 |
| 8872 | 2/25/2023  | 61 | I   |     | South Asian | 20.776 | 179.8   | Histopathology                | 6.090992328 |
| 8874 | 2/28/2023  | 34 | I   |     | South Asian | 23.495 | 16.5    | Histopathology                | 9.01745962  |
| 8875 | 2/28/2023  | 59 | II  | III | South Asian | 21.926 | 9.6     | Histopathology                | 6.20597229  |
| 8876 | 01/03/2023 | 53 | I   | N/A | South Asian | 19.91  | 129     | Histopathology                | 2.476598254 |
| 8877 | 01/03/2023 | 57 | I   | III | South Asian | 21.49  | 5.9     | Histopathology                | 3.034694796 |
| 8879 | 01/03/2023 | 36 | IIB | I   | South Asian | 19.704 | 10.3    | Histopathology                | 6.307763706 |
| 8880 | 01/03/2023 | 28 | IIA | I   | South Asian | 20.269 | 922.7   | Histopathology                | 0.243437267 |

|      |            |    |     |     |             |        |         |                |             |
|------|------------|----|-----|-----|-------------|--------|---------|----------------|-------------|
| 8881 | 03/03/2023 | 62 | I   | N/A | South Asian | 20.957 | 29.8    | Histopathology | 4.872282697 |
| 8882 | 03/03/2023 | 48 | I   | I   | South Asian | 22.667 | 12      | Histopathology | 8.057429395 |
| 8883 | 03/03/2023 | 57 | I   | N/A | South Asian | 22.827 | 10.8    | Histopathology | 5.972633686 |
| 8885 | 04/03/2023 | 52 | IIB | I   | South Asian | 20.812 | 367.3   | Histopathology | 6.859820197 |
| 8886 | 06/03/2023 | 43 | IIB | I   | South Asian | 22.032 | >1000.0 | Histopathology | 4.867840644 |
| 8887 | 06/03/2023 | 48 | I   | N/A | South Asian | 18.468 | 20.8    | Histopathology | 10.92813817 |
| 8888 | 06/03/2023 | 60 | I   | II  | South Asian | 23.733 | 14      | Histopathology | 11.09410112 |
| 8889 | 06/03/2023 | 72 | I   | N/A | South Asian | 25.076 | 8.2     | Histopathology | 2.465116051 |
| 8890 | 30/9/2022  | 45 | I   | II  | South Asian | 30.23  | 376.6   | Histopathology | 10.95421173 |
| 8891 | 30/9/2022  | 64 | I   | I   | South Asian | 23.89  | 391.4   | Histopathology | 7.602951675 |
| 8892 | 1-Oct-22   | 45 | III | II  | South Asian | 30.167 | 91.7    | Histopathology | 7.837512379 |
| 8893 | 24/12/22   | 72 | II  | I   | South Asian | 24.2   | 8.9     | Histopathology | 3.087992869 |

**Supplementary Table 2: Details of the individual NoC samples taken for the present study**

| <b>Lab ID</b> | <b>Age</b> | <b>Ethnicity</b> | <b>CA 125, U/mL</b> | <b>Oncoveryx score</b> |
|---------------|------------|------------------|---------------------|------------------------|
| <b>2853</b>   | 36         | Caucasian        | 10.4                | 8.0793                 |
| <b>651</b>    | 67         | Caucasian        | 12.1                | 8.076484112            |
| <b>141</b>    | 52         | Caucasian        | 19.7                | 5.174450427            |
| <b>670</b>    | 68         | Caucasian        | 8.5                 | 4.555671969            |
| <b>149</b>    | 41         | Caucasian        | 9.3                 | 3.019971301            |
| <b>2840</b>   | 43         | Caucasian        | 3.1                 | -0.03                  |
| <b>121</b>    | 54         | Caucasian        | 8.1                 | -0.23970965            |
| <b>2866</b>   | 64         | Caucasian        | 11.4                | -0.474690767           |
| <b>18</b>     | 41         | Caucasian        | 7.8                 | -0.683003401           |
| <b>22</b>     | 43         | Caucasian        | 39.1                | -0.783745804           |
| <b>145</b>    | 43         | Caucasian        | 13.2                | -0.789882513           |
| <b>668</b>    | 63         | Caucasian        | 11.6                | -0.807031742           |
| <b>124</b>    | 36         | Caucasian        | 11.1                | -0.869471404           |
| <b>2863</b>   | 68         | Caucasian        | 9.9                 | -1.004573041           |
| <b>2845</b>   | 60         | Caucasian        | 5.2                 | -1.0934                |
| <b>714</b>    | 40         | Caucasian        | 12                  | -1.099                 |
| <b>2839</b>   | 40         | Caucasian        | 10.4                | -1.111                 |
| <b>54</b>     | 48         | Caucasian        | 37.6                | -1.158559382           |
| <b>28</b>     | 34         | Caucasian        | 9.5                 | -1.300819664           |
| <b>2846</b>   | 65         | Caucasian        | 12.9                | -1.433                 |
| <b>90</b>     | 47         | Caucasian        | 8.2                 | -1.459593736           |
| <b>2867</b>   | 66         | Caucasian        | 9.6                 | -1.466567975           |
| <b>2841</b>   | 60         | Caucasian        | 10.6                | -1.49                  |
| <b>11</b>     | 51         | Caucasian        | 10.5                | -1.51602438            |
| <b>2864</b>   | 65         | Caucasian        | 8.4                 | -1.527184307           |
| <b>136</b>    | 40         | Caucasian        | 15.3                | -1.61581886            |
| <b>2858</b>   | 40         | Caucasian        | 14                  | -1.833027717           |
| <b>131</b>    | 37         | Caucasian        | 8.2                 | -2.028203551           |
| <b>712</b>    | 36         | Caucasian        | 6.1                 | -2.0934                |
| <b>2838</b>   | 32         | Caucasian        | 21.7                | -2.13                  |
| <b>110</b>    | 39         | Caucasian        | 11.5                | -2.1803175             |
| <b>10</b>     | 40         | Caucasian        | 35.5                | -2.259349681           |
| <b>665</b>    | 72         | Caucasian        | 5.7                 | -2.274702808           |
| <b>64</b>     | 47         | Caucasian        | 36                  | -2.377209895           |
| <b>14</b>     | 29         | Caucasian        | 17.9                | -2.402591479           |
| <b>125</b>    | 50         | Caucasian        | 7.6                 | -2.450409688           |
| <b>138</b>    | 41         | Caucasian        | 7.2                 | -2.485740555           |
| <b>660</b>    | 79         | Caucasian        | 16.9                | -2.511235489           |
| <b>55</b>     | 53         | Caucasian        | 37.7                | -2.565479908           |
| <b>147</b>    | 55         | Caucasian        | 16.5                | -2.587368168           |

|             |    |           |      |              |
|-------------|----|-----------|------|--------------|
| <b>144</b>  | 50 | Caucasian | 19.9 | -2.603285326 |
| <b>2862</b> | 66 | Caucasian | 10.1 | -2.616167126 |
| <b>13</b>   | 50 | Caucasian | 22.5 | -2.714575346 |
| <b>32</b>   | 33 | Caucasian | 25.7 | -2.72687483  |
| <b>130</b>  | 41 | Caucasian | 12.8 | -2.778545425 |
| <b>31</b>   | 52 | Caucasian | 14.3 | -2.839572328 |
| <b>128</b>  | 51 | Caucasian | 5.1  | -2.871126642 |
| <b>2842</b> | 67 | Caucasian | 11.7 | -2.943       |
| <b>135</b>  | 45 | Caucasian | 3.8  | -2.951288457 |
| <b>57</b>   | 47 | Caucasian | 43   | -2.962416645 |
| <b>2871</b> | 69 | Caucasian | 7.7  | -3.003938435 |
| <b>5</b>    | 26 | Caucasian | 7.6  | -3.046741651 |
| <b>2868</b> | 60 | Caucasian | 8    | -3.049851033 |
| <b>129</b>  | 54 | Caucasian | 17.3 | -3.057287319 |
| <b>2849</b> | 38 | Caucasian | 19   | -3.1074      |
| <b>2850</b> | 64 | Caucasian | 24   | -3.124679    |
| <b>27</b>   | 50 | Caucasian | 10.6 | -3.131899577 |
| <b>26</b>   | 41 | Caucasian | 23.1 | -3.166014793 |
| <b>2843</b> | 70 | Caucasian | 14.6 | -3.176       |
| <b>107</b>  | 45 | Caucasian | 15.7 | -3.264779913 |
| <b>134</b>  | 41 | Caucasian | 7.9  | -3.278924018 |
| <b>649</b>  | 61 | Caucasian | 14.8 | -3.29031609  |
| <b>111</b>  | 45 | Caucasian | 9.1  | -3.311299805 |
| <b>142</b>  | 39 | Caucasian | 4.3  | -3.501899557 |
| <b>19</b>   | 45 | Caucasian | 14.3 | -3.547724865 |
| <b>87</b>   | 44 | Caucasian | 14   | -3.560109995 |
| <b>2861</b> | 55 | Caucasian | 13   | -3.56146887  |
| <b>2860</b> | 48 | Caucasian | 10.5 | -3.574706943 |
| <b>2859</b> | 45 | Caucasian | 14.3 | -3.603964959 |
| <b>2865</b> | 68 | Caucasian | 10   | -3.680175634 |
| <b>56</b>   | 48 | Caucasian | 41.3 | -3.687673666 |
| <b>126</b>  | 47 | Caucasian | 4.2  | -3.732082377 |
| <b>106</b>  | 41 | Caucasian | 14.5 | -3.744894886 |
| <b>2837</b> | 38 | Caucasian | 20.4 | -3.78        |
| <b>88</b>   | 54 | Caucasian | 11.9 | -3.78050598  |
| <b>30</b>   | 50 | Caucasian | 10.9 | -3.792167154 |
| <b>23</b>   | 42 | Caucasian | 14.7 | -3.813537883 |
| <b>713</b>  | 38 | Caucasian | 5.5  | -3.8174      |
| <b>2848</b> | 31 | Caucasian | 18   | -3.849       |
| <b>658</b>  | 65 | Caucasian | 71.9 | -3.851833561 |
| <b>29</b>   | 33 | Caucasian | 16.1 | -3.883384584 |
| <b>2854</b> | 31 | Caucasian | 10.4 | -3.952181645 |
| <b>2857</b> | 54 | Caucasian | 10.6 | -4.002234041 |
| <b>16</b>   | 34 | Caucasian | 10.8 | -4.005747558 |



|             |    |           |      |              |
|-------------|----|-----------|------|--------------|
| <b>2870</b> | 63 | Caucasian | 8.3  | -4.027804931 |
| <b>98</b>   | 49 | Caucasian | 9.8  | -4.102401629 |
| <b>70</b>   | 54 | Caucasian | 10.7 | -4.205875303 |
| <b>669</b>  | 64 | Caucasian | 20.5 | -4.214507142 |
| <b>9</b>    | 43 | Caucasian | 11.9 | -4.27509672  |
| <b>25</b>   | 43 | Caucasian | 15   | -4.481244885 |
| <b>654</b>  | 67 | Caucasian | 18.9 | -4.485596577 |
| <b>33</b>   | 54 | Caucasian | 19.9 | -4.501605507 |
| <b>152</b>  | 44 | Caucasian | 16.3 | -4.519799456 |
| <b>100</b>  | 52 | Caucasian | 10.7 | -4.548615764 |
| <b>2869</b> | 68 | Caucasian | 6.5  | -4.616266222 |
| <b>50</b>   | 42 | Caucasian | 15.9 | -4.641622278 |
| <b>65</b>   | 55 | Caucasian | 7.7  | -4.704936891 |
| <b>15</b>   | 44 | Caucasian | 14.4 | -4.710852228 |
| <b>21</b>   | 55 | Caucasian | 9.5  | -4.726961068 |
| <b>157</b>  | 50 | Caucasian | 9.7  | -4.773234179 |
| <b>68</b>   | 53 | Caucasian | 11.9 | -4.786588752 |
| <b>82</b>   | 38 | Caucasian | 10.2 | -4.799111262 |
| <b>148</b>  | 41 | Caucasian | 3.8  | -4.838421874 |
| <b>103</b>  | 50 | Caucasian | 9.7  | -4.844831916 |
| <b>716</b>  | 40 | Caucasian | 12.5 | -4.856089392 |
| <b>47</b>   | 41 | Caucasian | 18.7 | -4.913595785 |
| <b>112</b>  | 54 | Caucasian | 8.2  | -5.015319845 |
| <b>151</b>  | 48 | Caucasian | 11.1 | -5.028042418 |
| <b>83</b>   | 50 | Caucasian | 10.5 | -5.083547868 |
| <b>20</b>   | 38 | Caucasian | 21.8 | -5.089847326 |
| <b>94</b>   | 46 | Caucasian | 9.2  | -5.089866002 |
| <b>2851</b> | 36 | Caucasian | 9.1  | -5.1095      |
| <b>140</b>  | 45 | Caucasian | 18.8 | -5.110570544 |
| <b>2844</b> | 63 | Caucasian | 11.8 | -5.129       |
| <b>71</b>   | 52 | Caucasian | 8.6  | -5.228444789 |
| <b>93</b>   | 51 | Caucasian | 11.3 | -5.243333878 |
| <b>104</b>  | 45 | Caucasian | 9.8  | -5.322020652 |
| <b>86</b>   | 48 | Caucasian | 13.7 | -5.330555912 |
| <b>663</b>  | 68 | Caucasian | 9.1  | -5.344003361 |
| <b>97</b>   | 53 | Caucasian | 10.1 | -5.381998889 |
| <b>12</b>   | 49 | Caucasian | 13.7 | -5.388588027 |
| <b>81</b>   | 44 | Caucasian | 10.5 | -5.415647524 |
| <b>108</b>  | 56 | Caucasian | 17.1 | -5.469983909 |
| <b>58</b>   | 53 | Caucasian | 14.9 | -5.498762664 |
| <b>52</b>   | 47 | Caucasian | 17.6 | -5.61884804  |
| <b>99</b>   | 55 | Caucasian | 10.7 | -5.622432585 |
| <b>2873</b> | 65 | Caucasian | 10.9 | -5.633606031 |
| <b>69</b>   | 51 | Caucasian | 11   | -5.689950936 |

|             |    |           |       |              |
|-------------|----|-----------|-------|--------------|
| <b>675</b>  | 72 | Caucasian | 65.7  | -5.720646055 |
| <b>666</b>  | 78 | Caucasian | 9.4   | -5.798953406 |
| <b>62</b>   | 53 | Caucasian | 15.5  | -5.901076008 |
| <b>715</b>  | 40 | Caucasian | 6.2   | -5.918209    |
| <b>66</b>   | 53 | Caucasian | 7.7   | -5.94354757  |
| <b>159</b>  | 55 | Caucasian | 4.5   | -5.946982277 |
| <b>650</b>  | 67 | Caucasian | 15.8  | -5.951760961 |
| <b>2886</b> | 62 | Caucasian | 7.8   | -5.952342232 |
| <b>96</b>   | 49 | Caucasian | 26.6  | -5.976746582 |
| <b>2885</b> | 60 | Caucasian | 8.2   | -5.989790828 |
| <b>85</b>   | 50 | Caucasian | 10.7  | -5.999576324 |
| <b>2847</b> | 35 | Caucasian | 20.3  | -6.0243      |
| <b>51</b>   | 46 | Caucasian | < 1.0 | -6.125350227 |
| <b>158</b>  | 53 | Caucasian | 17.9  | -6.126796018 |
| <b>143</b>  | 48 | Caucasian | 2.3   | -6.128438465 |
| <b>84</b>   | 50 | Caucasian | 11.9  | -6.174964029 |
| <b>2872</b> | 61 | Caucasian | 10.2  | -6.192463632 |
| <b>60</b>   | 47 | Caucasian | 13.6  | -6.218648937 |
| <b>154</b>  | 49 | Caucasian | 16.1  | -6.318538799 |
| <b>3</b>    | 48 | Caucasian | 22.8  | -6.408745613 |
| <b>92</b>   | 43 | Caucasian | 9.1   | -6.480830197 |
| <b>674</b>  | 73 | Caucasian | 10.9  | -6.486082535 |
| <b>109</b>  | 55 | Caucasian | 15.4  | -6.528661683 |
| <b>24</b>   | 25 | Caucasian | 22.6  | -6.558551535 |
| <b>102</b>  | 41 | Caucasian | 9.7   | -6.563534965 |
| <b>655</b>  | 71 | Caucasian | 6.3   | -6.642292764 |
| <b>95</b>   | 51 | Caucasian | 14.6  | -6.649023214 |
| <b>155</b>  | 49 | Caucasian | 7.2   | -6.692285146 |
| <b>89</b>   | 55 | Caucasian | 11.6  | -6.7042907   |
| <b>17</b>   | 30 | Caucasian | 9.5   | -6.731706478 |
| <b>67</b>   | 52 | Caucasian | 12.1  | -6.734381993 |
| <b>122</b>  | 49 | Caucasian | 6.1   | -6.736668019 |
| <b>101</b>  | 51 | Caucasian | 10.8  | -6.768336862 |
| <b>2874</b> | 58 | Caucasian | 12.1  | -6.794642635 |
| <b>667</b>  | 63 | Caucasian | 6.8   | -6.79564602  |
| <b>53</b>   | 55 | Caucasian | 12.6  | -6.838215545 |
| <b>73</b>   | 50 | Caucasian | 15.8  | -6.913585663 |
| <b>718</b>  | 41 | Caucasian | 5.9   | -6.914853521 |
| <b>133</b>  | 36 | Caucasian | 9.1   | -6.963440713 |
| <b>132</b>  | 44 | Caucasian | 16.2  | -6.966912457 |
| <b>59</b>   | 56 | Caucasian | 15.8  | -6.984104633 |
| <b>2855</b> | 60 | Caucasian | 9     | -6.990170271 |
| <b>123</b>  | 50 | Caucasian | 18.4  | -7.052992297 |
| <b>686</b>  | 23 | Caucasian | 21.3  | -7.078581837 |

|             |    |           |      |              |
|-------------|----|-----------|------|--------------|
| <b>91</b>   | 54 | Caucasian | 9.7  | -7.08803528  |
| <b>156</b>  | 50 | Caucasian | 2.8  | -7.097334534 |
| <b>2852</b> | 28 | Caucasian | 6.3  | -7.105       |
| <b>34</b>   | 28 | Caucasian | 9.1  | -7.109243898 |
| <b>6</b>    | 35 | Caucasian | 58.3 | -7.115660339 |
| <b>2</b>    | 55 | Caucasian | 12.6 | -7.116331742 |
| <b>661</b>  | 66 | Caucasian | 15.8 | -7.12927633  |
| <b>48</b>   | 52 | Caucasian | 18.3 | -7.245209982 |
| <b>2856</b> | 50 | Caucasian | 10.3 | -7.278081685 |
| <b>127</b>  | 49 | Caucasian | 11.4 | -7.281307729 |
| <b>719</b>  | 42 | Caucasian | 7    | -7.296253726 |
| <b>2883</b> | 50 | Caucasian | 14.7 | -7.304926017 |
| <b>2878</b> | 57 | Caucasian | 8.6  | -7.307180569 |
| <b>72</b>   | 54 | Caucasian | 10.4 | -7.350351529 |
| <b>2880</b> | 60 | Caucasian | 14.7 | -7.35584772  |
| <b>79</b>   | 41 | Caucasian | 10.1 | -7.3665694   |
| <b>662</b>  | 73 | Caucasian | 23.6 | -7.383495446 |
| <b>137</b>  | 35 | Caucasian | 13.2 | -7.398561236 |
| <b>37</b>   | 47 | Caucasian | 60.3 | -7.415676555 |
| <b>726</b>  | 48 | Caucasian | 9.1  | -7.431444549 |
| <b>150</b>  | 51 | Caucasian | 2.8  | -7.465148775 |
| <b>119</b>  | 44 | Caucasian | 12.4 | -7.503640679 |
| <b>717</b>  | 40 | Caucasian | 6.2  | -7.558767523 |
| <b>139</b>  | 36 | Caucasian | 61.8 | -7.574772605 |
| <b>4</b>    | 50 | Caucasian | 29.3 | -7.587985316 |
| <b>652</b>  | 63 | Caucasian | 43.7 | -7.66620743  |
| <b>1</b>    | 54 | Caucasian | 15.7 | -7.720880445 |
| <b>723</b>  | 45 | Caucasian | 5.8  | -7.775909537 |
| <b>722</b>  | 43 | Caucasian | 6.8  | -7.800152377 |
| <b>677</b>  | 65 | Caucasian | 12.7 | -7.851147462 |
| <b>2879</b> | 64 | Caucasian | 6.8  | -7.877481082 |
| <b>729</b>  | 50 | Caucasian | 9.9  | -7.951150442 |
| <b>146</b>  | 39 | Caucasian | 7.6  | -7.995006939 |
| <b>659</b>  | 68 | Caucasian | 15.1 | -8.019681909 |
| <b>725</b>  | 47 | Caucasian | 6.8  | -8.034053553 |
| <b>2876</b> | 60 | Caucasian | 9.3  | -8.053606397 |
| <b>49</b>   | 45 | Caucasian | 16.3 | -8.066831001 |
| <b>44</b>   | 45 | Caucasian | 39.7 | -8.142843138 |
| <b>115</b>  | 37 | Caucasian | 13.6 | -8.157889304 |
| <b>153</b>  | 39 | Caucasian | 14.7 | -8.265502068 |
| <b>735</b>  | 54 | Caucasian | 9.1  | -8.288396045 |
| <b>737</b>  | 60 | Caucasian | 6.4  | -8.338118068 |
| <b>733</b>  | 52 | Caucasian | 8.5  | -8.341685505 |
| <b>701</b>  | 60 | Caucasian | 6.1  | -8.369274768 |

|             |    |           |       |              |
|-------------|----|-----------|-------|--------------|
| <b>2877</b> | 63 | Caucasian | 8.1   | -8.425929183 |
| <b>732</b>  | 51 | Caucasian | 12.4  | -8.479749234 |
| <b>653</b>  | 80 | Caucasian | 5     | -8.48354863  |
| <b>720</b>  | 43 | Caucasian | 12.1  | -8.505234667 |
| <b>711</b>  | 59 | Caucasian | 15.9  | -8.552585015 |
| <b>63</b>   | 48 | Caucasian | 13    | -8.557696206 |
| <b>730</b>  | 50 | Caucasian | 8.5   | -8.57680429  |
| <b>80</b>   | 53 | Caucasian | 11.8  | -8.614371646 |
| <b>118</b>  | 43 | Caucasian | 8.4   | -8.622191542 |
| <b>74</b>   | 45 | Caucasian | 16.1  | -8.644090089 |
| <b>7</b>    | 56 | Caucasian | 12    | -8.66793886  |
| <b>2881</b> | 51 | Caucasian | 13.7  | -8.722719795 |
| <b>113</b>  | 50 | Caucasian | 4.8   | -8.726187095 |
| <b>656</b>  | 69 | Caucasian | 35    | -8.791482447 |
| <b>46</b>   | 54 | Caucasian | 10.7  | -8.81111937  |
| <b>105</b>  | 54 | Caucasian | 10.4  | -8.856432794 |
| <b>76</b>   | 54 | Caucasian | 7.7   | -8.946842007 |
| <b>703</b>  | 34 | Caucasian | 6.8   | -8.96396281  |
| <b>690</b>  | 56 | Caucasian | 7.7   | -8.976909845 |
| <b>694</b>  | 54 | Caucasian | 188.2 | -9.362942791 |
| <b>736</b>  | 56 | Caucasian | 9.1   | -9.393440904 |
| <b>657</b>  | 67 | Caucasian | 38    | -9.434387388 |
| <b>728</b>  | 48 | Caucasian | 8.7   | -9.462819618 |
| <b>734</b>  | 52 | Caucasian | 8.3   | -9.564575497 |
| <b>117</b>  | 39 | Caucasian | 8     | -9.623777089 |
| <b>731</b>  | 50 | Caucasian | 7.1   | -9.656305397 |
| <b>114</b>  | 38 | Caucasian | 6.9   | -9.721651617 |
| <b>696</b>  | 60 | Caucasian | 39.5  | -9.776634947 |
| <b>724</b>  | 45 | Caucasian | 17.9  | -9.777839642 |
| <b>679</b>  | 63 | Caucasian | 17.2  | -9.780410209 |
| <b>672</b>  | 71 | Caucasian | 14.1  | -9.796490142 |
| <b>707</b>  | 40 | Caucasian | 11.1  | -9.984317244 |
| <b>78</b>   | 51 | Caucasian | 8.6   | -10.01837133 |
| <b>671</b>  | 72 | Caucasian | 14    | -10.07118327 |
| <b>61</b>   | 42 | Caucasian | 14.9  | -10.08042942 |
| <b>697</b>  | 58 | Caucasian | 12.1  | -10.10615961 |
| <b>664</b>  | 68 | Caucasian | 14.1  | -10.16620522 |
| <b>2875</b> | 59 | Caucasian | 10.5  | -10.18231967 |
| <b>727</b>  | 48 | Caucasian | 8.7   | -10.19986514 |
| <b>38</b>   | 40 | Caucasian | 20.2  | -10.37741089 |
| <b>40</b>   | 34 | Caucasian | 24.8  | -10.41124517 |
| <b>710</b>  | 47 | Caucasian | 20.2  | -10.41799739 |
| <b>2882</b> | 57 | Caucasian | 15.9  | -10.57701113 |
| <b>695</b>  | 60 | Caucasian | 15.6  | -10.76611005 |

|               |            |                  |                     |                       |
|---------------|------------|------------------|---------------------|-----------------------|
| 39            | 24         | Caucasian        | 12.2                | -10.84842737          |
| 77            | 45         | Caucasian        | 7.9                 | -10.85717217          |
| 116           | 38         | Caucasian        | 7.9                 | -10.85909444          |
| 43            | 22         | Caucasian        | 17.7                | -10.87198483          |
| 698           | 59         | Caucasian        | 11.8                | -10.94332229          |
| 42            | 32         | Caucasian        | 26.4                | -10.97148974          |
| 692           | 56         | Caucasian        | 9.1                 | -11.20591769          |
| 689           | 58         | Caucasian        | 14.1                | -11.21841901          |
| 699           | 60         | Caucasian        | 21                  | -11.24474508          |
| 693           | 54         | Caucasian        | 13.8                | -11.35699599          |
| 41            | 37         | Caucasian        | 16.4                | -11.36073583          |
| 2884          | 48         | Caucasian        | 14.2                | -11.3706788           |
| 35            | 37         | Caucasian        | 27.1                | -11.3721682           |
| 678           | 63         | Caucasian        | 8                   | -11.41021983          |
| 36            | 25         | Caucasian        | 11.2                | -11.43835227          |
| 45            | 21         | Caucasian        | 20.9                | -11.50889223          |
| 700           | 56         | Caucasian        | 8.5                 | -11.72277871          |
| 673           | 64         | Caucasian        | 24.2                | -11.81099714          |
| 691           | 59         | Caucasian        | 329.4               | -11.85625395          |
| 685           | 21         | Caucasian        | 13.8                | -11.90684742          |
| 706           | 37         | Caucasian        | 31.7                | -11.91491376          |
| 708           | 43         | Caucasian        | 16.8                | -12.00913803          |
| 680           | 24         | Caucasian        | 21.7                | -12.01340297          |
| 705           | 37         | Caucasian        | 16.3                | -12.13812673          |
| 687           | 29         | Caucasian        | 7.4                 | -12.35871921          |
| 721           | 43         | Caucasian        | 8.3                 | -12.36490397          |
| 8             | 39         | Caucasian        | 5.6                 | -12.39207339          |
| 684           | 19         | Caucasian        | 8.3                 | -12.50628901          |
| 75            | 52         | Caucasian        | 7.3                 | -12.51377099          |
| 709           | 45         | Caucasian        | 8.6                 | -12.64257369          |
| 688           | 27         | Caucasian        | 12.6                | -12.6592074           |
| 120           | 49         | Caucasian        | 10.2                | -12.76655324          |
| 681           | 25         | Caucasian        | 90.8                | -12.99581074          |
| 676           | 68         | Caucasian        | 14.7                | -13.1492503           |
| 702           | 31         | Caucasian        | 11.4                | -13.48453356          |
| 704           | 35         | Caucasian        | 9.4                 | -13.55141426          |
| 682           | 24         | Caucasian        | 26.4                | -13.65968327          |
| 683           | 23         | Caucasian        | 10.9                | -13.86930941          |
| <b>Lab ID</b> | <b>Age</b> | <b>Ethnicity</b> | <b>CA 125, U/mL</b> | <b>Oncoeryx score</b> |
| 4227          | 71         | South Asian      | 8.1                 | 1.408792797           |
| 4172          | 60         | South Asian      | 10.8                | 1.293861737           |
| 4030          | 40         | South Asian      | 15.2                | -0.999                |
| 5264          | 44         | South Asian      | 13.6                | -1.0923               |
| 6590          | 35         | South Asian      | 20.4                | -1.8437               |

|      |    |             |       |              |
|------|----|-------------|-------|--------------|
| 5272 | 32 | South Asian | 10.1  | -1.223       |
| 5275 | 49 | South Asian | 20.9  | -2.09843     |
| 5273 | 45 | South Asian | 381.3 | -2.224       |
| 5293 | 32 | South Asian | 32.1  | -2.934       |
| 4247 | 38 | South Asian | 17.3  | -3.080545605 |
| 4296 | 44 | South Asian | 10.1  | -3.402996256 |
| 5271 | 46 | South Asian | 10.7  | -3.59        |
| 4300 | 50 | South Asian | 5.4   | -3.662961477 |
| 4099 | 32 | South Asian | 30.4  | -3.758846221 |
| 4214 | 50 | South Asian | 8.8   | -3.772097488 |
| 6627 | 62 | South Asian | 11.7  | -3.9085      |
| 4248 | 45 | South Asian | 16.9  | -3.973290336 |
| 4189 | 50 | South Asian | 30.9  | -3.992139391 |
| 6515 | 33 | South Asian | 46.4  | -4.052341927 |
| 5285 | 65 | South Asian | 9.2   | -4.1084      |
| 5274 | 48 | South Asian | 233.1 | -4.1298      |
| 4185 | 56 | South Asian | 14    | -4.155274979 |
| 4200 | 35 | South Asian | 8.5   | -4.186728234 |
| 4263 | 58 | South Asian | 39.5  | -4.189991136 |
| 4097 | 34 | South Asian | 15.2  | -4.212250412 |
| 5270 | 41 | South Asian | 7.3   | -4.3094      |
| 4002 | 70 | South Asian | 4.3   | -4.367361313 |
| 4017 | 50 | South Asian | 5.9   | -4.381390052 |
| 4032 | 46 | South Asian | 14.4  | -4.453464825 |
| 4241 | 39 | South Asian | 9.6   | -4.474995003 |
| 4226 | 48 | South Asian | 10.1  | -4.484167528 |
| 4239 | 55 | South Asian | 9.4   | -4.485598834 |
| 4159 | 31 | South Asian | 8.1   | -4.566201161 |
| 4290 | 41 | South Asian | 5.3   | -4.648201172 |
| 4276 | 55 | South Asian | 9.5   | -4.68254338  |
| 4219 | 46 | South Asian | 30.8  | -4.69064478  |
| 4166 | 48 | South Asian | 16    | -4.802861388 |
| 4145 | 45 | South Asian | 12.4  | -4.822247155 |
| 4284 | 35 | South Asian | 14.3  | -4.969336141 |
| 6504 | 36 | South Asian | 17    | -5.049581578 |
| 4129 | 39 | South Asian | 8     | -5.063155261 |
| 6603 | 66 | South Asian | 6     | -5.10974     |
| 5263 | 42 | South Asian | 4.6   | -5.12        |
| 5301 | 65 | South Asian | 19.6  | -5.12        |
| 5269 | 31 | South Asian | 21.8  | -5.12093     |
| 4242 | 50 | South Asian | 10.1  | -5.123084041 |
| 4181 | 59 | South Asian | 7.6   | -5.128133736 |
| 4007 | 45 | South Asian | 14.4  | -5.141445158 |
| 4397 | 31 | South Asian | 10    | -5.149678147 |
| 4114 | 42 | South Asian | 6.6   | -5.171858458 |
| 6622 | 62 | South Asian | 42    | -5.2093      |
| 4156 | 32 | South Asian | 9.8   | -5.21165947  |

|             |    |             |       |              |
|-------------|----|-------------|-------|--------------|
| <b>4116</b> | 47 | South Asian | 13.3  | -5.252351039 |
| <b>4001</b> | 36 | South Asian | 24.1  | -5.322404089 |
| <b>4171</b> | 55 | South Asian | 5.9   | -5.334737289 |
| <b>4070</b> | 54 | South Asian | 11.2  | -5.360345506 |
| <b>4231</b> | 63 | South Asian | 6.4   | -5.363693989 |
| <b>4311</b> | 31 | South Asian | 13.2  | -5.418984555 |
| <b>4224</b> | 42 | South Asian | 9.6   | -5.438714032 |
| <b>4221</b> | 60 | South Asian | 39.8  | -5.454759595 |
| <b>4076</b> | 42 | South Asian | 14.5  | -5.526663188 |
| <b>4004</b> | 52 | South Asian | 6.9   | -5.549297337 |
| <b>4024</b> | 40 | South Asian | 19.7  | -5.562785628 |
| <b>4270</b> | 45 | South Asian | 36    | -5.573169611 |
| <b>2946</b> | 54 | South Asian | 12.8  | -5.577697152 |
| <b>4216</b> | 34 | South Asian | 17.6  | -5.599417826 |
| <b>4106</b> | 55 | South Asian | 840.9 | -5.683293842 |
| <b>4236</b> | 34 | South Asian | 3.9   | -5.716557787 |
| <b>4199</b> | 45 | South Asian | 5.4   | -5.757713143 |
| <b>4279</b> | 69 | South Asian | 7.6   | -5.775969531 |
| <b>4206</b> | 36 | South Asian | 7.7   | -5.824311612 |
| <b>4297</b> | 41 | South Asian | 37.9  | -5.864030124 |
| <b>4299</b> | 37 | South Asian | 3.7   | -5.864904151 |
| <b>4115</b> | 70 | South Asian | 11.3  | -5.866791258 |
| <b>4360</b> | 63 | South Asian | 16.9  | -5.893466382 |
| <b>4207</b> | 57 | South Asian | 7.8   | -5.90482518  |
| <b>5279</b> | 50 | South Asian | 20.2  | -5.9184      |
| <b>4120</b> | 69 | South Asian | 4.4   | -6.007645102 |
| <b>4234</b> | 46 | South Asian | 10.5  | -6.048826697 |
| <b>4167</b> | 55 | South Asian | 5.4   | -6.078967239 |
| <b>4249</b> | 50 | South Asian | 5.8   | -6.082621184 |
| <b>4031</b> | 40 | South Asian | 18.2  | -6.118218436 |
| <b>5278</b> | 64 | South Asian | 15.2  | -6.124       |
| <b>4098</b> | 32 | South Asian | 11.6  | -6.126416735 |
| <b>4298</b> | 35 | South Asian | 781.9 | -6.12917712  |
| <b>4262</b> | 37 | South Asian | 20.1  | -6.176763726 |
| <b>4101</b> | 65 | South Asian | 10.5  | -6.228304465 |
| <b>5277</b> | 48 | South Asian | 6.2   | -6.23098     |
| <b>4138</b> | 40 | South Asian | 15.7  | -6.231285245 |
| <b>4237</b> | 35 | South Asian | 9.7   | -6.274968729 |
| <b>5265</b> | 42 | South Asian | 10.2  | -6.2837      |
| <b>4373</b> | 38 | South Asian | 39    | -6.291944039 |
| <b>4261</b> | 38 | South Asian | 110.1 | -6.307185882 |
| <b>4233</b> | 49 | South Asian | 15.6  | -6.361349439 |
| <b>4117</b> | 54 | South Asian | 11.4  | -6.390136991 |
| <b>4173</b> | 59 | South Asian | 7.8   | -6.396352595 |
| <b>4165</b> | 57 | South Asian | 11    | -6.44736801  |
| <b>4078</b> | 62 | South Asian | 8.4   | -6.457177471 |

|      |    |             |       |              |
|------|----|-------------|-------|--------------|
| 4170 | 45 | South Asian | 9.8   | -6.461109299 |
| 4273 | 38 | South Asian | 13.4  | -6.465889042 |
| 4191 | 70 | South Asian | 5.1   | -6.564480524 |
| 4268 | 40 | South Asian | 8.1   | -6.576640546 |
| 6414 | 76 | South Asian | 13.4  | -6.587739353 |
| 4100 | 38 | South Asian | 17.6  | -6.592327142 |
| 4012 | 59 | South Asian | 4.8   | -6.625801956 |
| 4140 | 37 | South Asian | 12.7  | -6.635866319 |
| 4163 | 63 | South Asian | 9.2   | -6.662387142 |
| 4141 | 41 | South Asian | 8     | -6.766860557 |
| 4223 | 53 | South Asian | 10.8  | -6.839437813 |
| 4205 | 50 | South Asian | 29    | -6.868133257 |
| 4150 | 55 | South Asian | 11.1  | -6.896222268 |
| 4238 | 58 | South Asian | 22.1  | -6.898786612 |
| 3151 | 64 | South Asian | 6.3   | -6.901000372 |
| 4105 | 46 | South Asian | 862.2 | -6.915388726 |
| 4023 | 47 | South Asian | 22.7  | -6.93796393  |
| 4196 | 40 | South Asian | 18    | -6.962242036 |
| 4025 | 39 | South Asian | 11    | -6.971518189 |
| 6531 | 32 | South Asian | 17.8  | -6.992743151 |
| 4228 | 57 | South Asian | 3.9   | -7.002703277 |
| 4168 | 54 | South Asian | 4.6   | -7.020462374 |
| 4019 | 75 | South Asian | 7.9   | -7.079595725 |
| 5306 | 67 | South Asian | 10.6  | -7.09        |
| 6598 | 65 | South Asian | 6.7   | -7.1984      |
| 4289 | 32 | South Asian | 12.4  | -7.203098188 |
| 4158 | 34 | South Asian | 10.5  | -7.286826942 |
| 4253 | 43 | South Asian | 11.5  | -7.315303246 |
| 4094 | 50 | South Asian | 13.6  | -7.335889037 |
| 2949 | 54 | South Asian | 7.8   | -7.344155947 |
| 4269 | 42 | South Asian | 6.1   | -7.458587033 |
| 4095 | 45 | South Asian | 15    | -7.466206845 |
| 4257 | 60 | South Asian | 8.8   | -7.486433793 |
| 4182 | 40 | South Asian | 27.1  | -7.539205902 |
| 4246 | 35 | South Asian | 8.3   | -7.545511361 |
| 4256 | 44 | South Asian | 5.9   | -7.570513914 |
| 4015 | 32 | South Asian | 15.5  | -7.604063512 |
| 4108 | 59 | South Asian | 16    | -7.634054947 |
| 4204 | 57 | South Asian | 58.2  | -7.695127501 |
| 4225 | 32 | South Asian | 8.9   | -7.700625293 |
| 4229 | 53 | South Asian | 12.2  | -7.715726926 |
| 4092 | 35 | South Asian | 7.1   | -7.716639126 |
| 4035 | 36 | South Asian | 13.4  | -7.718494556 |
| 4122 | 61 | South Asian | 6.2   | -7.811217599 |
| 4201 | 62 | South Asian | 6.1   | -7.820785951 |
| 4162 | 62 | South Asian | 13.2  | -7.829393046 |



|             |    |             |      |              |
|-------------|----|-------------|------|--------------|
| <b>2903</b> | 46 | South Asian | 13.5 | -7.885084463 |
| <b>4054</b> | 56 | South Asian | 7.1  | -7.955245673 |
| <b>4112</b> | 50 | South Asian | 46.4 | -7.957604914 |
| <b>2895</b> | 37 | South Asian | 19.7 | -7.960514239 |
| <b>4217</b> | 48 | South Asian | 5.5  | -7.988186809 |
| <b>4121</b> | 70 | South Asian | 9.3  | -8.025620124 |
| <b>4259</b> | 34 | South Asian | 12   | -8.073482673 |
| <b>4202</b> | 32 | South Asian | 52.6 | -8.102182367 |
| <b>4280</b> | 45 | South Asian | 10   | -8.109375329 |
| <b>4021</b> | 33 | South Asian | 15.9 | -8.138307887 |
| <b>4184</b> | 48 | South Asian | 18.9 | -8.160210823 |
| <b>4034</b> | 40 | South Asian | 10.9 | -8.2027544   |
| <b>4013</b> | 42 | South Asian | 23.6 | -8.229207836 |
| <b>4148</b> | 62 | South Asian | 7.1  | -8.257664509 |
| <b>4018</b> | 45 | South Asian | 22.1 | -8.261320339 |
| <b>4220</b> | 45 | South Asian | 19.1 | -8.307651316 |
| <b>4369</b> | 37 | South Asian | 7.8  | -8.330729647 |
| <b>4183</b> | 42 | South Asian | 16.9 | -8.342935618 |
| <b>4119</b> | 71 | South Asian | 6.3  | -8.373005912 |
| <b>4102</b> | 38 | South Asian | 5    | -8.433477957 |
| <b>4188</b> | 55 | South Asian | 10.9 | -8.471576613 |
| <b>4033</b> | 52 | South Asian | 10.4 | -8.473424026 |
| <b>4153</b> | 32 | South Asian | 8.4  | -8.538624765 |
| <b>4010</b> | 35 | South Asian | 6.8  | -8.543456399 |
| <b>4016</b> | 45 | South Asian | 22   | -8.556201947 |
| <b>4317</b> | 32 | South Asian | 37.6 | -8.598564429 |
| <b>4107</b> | 60 | South Asian | 5.2  | -8.610146859 |
| <b>4046</b> | 38 | South Asian | 11.2 | -8.614544396 |
| <b>4093</b> | 45 | South Asian | 9    | -8.633301855 |
| <b>4067</b> | 58 | South Asian | 5.4  | -8.703763934 |
| <b>6494</b> | 31 | South Asian | 9    | -8.817966895 |
| <b>5262</b> | 40 | South Asian | 6.9  | -8.8273      |
| <b>2926</b> | 44 | South Asian | 33.8 | -8.9443424   |
| <b>5268</b> | 31 | South Asian | 25.3 | -8.9824      |
| <b>4258</b> | 53 | South Asian | 8.5  | -9.021846516 |
| <b>4230</b> | 55 | South Asian | 9.2  | -9.039650692 |
| <b>4255</b> | 55 | South Asian | 12.7 | -9.08060909  |
| <b>4381</b> | 62 | South Asian | 7.8  | -9.148297168 |
| <b>4198</b> | 60 | South Asian | 8.3  | -9.152375956 |
| <b>6610</b> | 66 | South Asian | 20.1 | -9.1984      |
| <b>4212</b> | 56 | South Asian | 5.3  | -9.273483185 |
| <b>4304</b> | 76 | South Asian | 29.2 | -9.285968815 |
| <b>6478</b> | 75 | South Asian | 13.6 | -9.337315446 |
| <b>6468</b> | 78 | South Asian | 7.3  | -9.360840954 |
| <b>4049</b> | 68 | South Asian | 8.5  | -9.384507218 |
| <b>4399</b> | 67 | South Asian | 11.8 | -9.389063242 |

|      |    |             |       |              |
|------|----|-------------|-------|--------------|
| 4056 | 34 | South Asian | 7     | -9.428958428 |
| 4137 | 65 | South Asian | 7.1   | -9.465970779 |
| 4208 | 68 | South Asian | 13.3  | -9.495876732 |
| 4164 | 45 | South Asian | 13.7  | -9.546528557 |
| 4232 | 76 | South Asian | 19.9  | -9.658511088 |
| 4267 | 50 | South Asian | 25.9  | -9.66869601  |
| 4254 | 52 | South Asian | 11.4  | -9.741617483 |
| 4050 | 65 | South Asian | 8.1   | -9.755957608 |
| 4113 | 34 | South Asian | 15.4  | -9.765612848 |
| 4209 | 42 | South Asian | 3.1   | -9.767256938 |
| 4149 | 65 | South Asian | 6.7   | -9.780322337 |
| 4235 | 51 | South Asian | 9.1   | -9.884846035 |
| 4222 | 75 | South Asian | 14.5  | -9.923533942 |
| 5282 | 57 | South Asian | 13.4  | -9.9283      |
| 4286 | 48 | South Asian | 8.4   | -10.05611515 |
| 4271 | 67 | South Asian | 9.2   | -10.08173065 |
| 4264 | 48 | South Asian | 6.3   | -10.09890158 |
| 4058 | 55 | South Asian | 17.9  | -10.12895249 |
| 4059 | 42 | South Asian | 14.6  | -10.19086892 |
| 6425 | 61 | South Asian | 14.3  | -10.25313657 |
| 6545 | 69 | South Asian | 9.2   | -10.26817938 |
| 4103 | 48 | South Asian | 57.1  | -10.31055077 |
| 6512 | 61 | South Asian | 11.2  | -10.4412726  |
| 4066 | 40 | South Asian | 12.9  | -10.58119071 |
| 4215 | 58 | South Asian | 9     | -10.58241587 |
| 4068 | 32 | South Asian | 10.4  | -10.69800368 |
| 4161 | 50 | South Asian | 10.2  | -10.70484868 |
| 4042 | 35 | South Asian | 18.5  | -10.82752922 |
| 4063 | 44 | South Asian | 20.6  | -10.82930625 |
| 4169 | 63 | South Asian | 13.8  | -10.83803805 |
| 4132 | 42 | South Asian | 16.1  | -11.01011235 |
| 4211 | 35 | South Asian | 4.8   | -11.03152417 |
| 4213 | 64 | South Asian | 2.8   | -11.03527297 |
| 3096 | 38 | South Asian | 70.8  | -11.07834012 |
| 3156 | 65 | South Asian | 560.2 | -11.10494061 |
| 4055 | 56 | South Asian | 20.9  | -11.1933988  |
| 2917 | 57 | South Asian | 9.1   | -11.21230881 |
| 4265 | 58 | South Asian | 6     | -11.26667614 |
| 4077 | 55 | South Asian | 7.1   | -11.27998408 |
| 2905 | 40 | South Asian | 13.1  | -11.31215885 |
| 4005 | 45 | South Asian | 8.9   | -11.33703107 |
| 4357 | 40 | South Asian | 23    | -11.34011483 |
| 4152 | 34 | South Asian | 15.8  | -11.35984658 |
| 4355 | 73 | South Asian | 7.4   | -11.36024307 |
| 4240 | 35 | South Asian | 19.2  | -11.48433339 |
| 4111 | 63 | South Asian | 9.4   | -11.50809929 |

|             |    |             |      |              |
|-------------|----|-------------|------|--------------|
| <b>4072</b> | 53 | South Asian | 2.6  | -11.51287759 |
| <b>4090</b> | 43 | South Asian | 12.9 | -11.5457907  |
| <b>4194</b> | 63 | South Asian | 9.6  | -11.55409075 |
| <b>6542</b> | 80 | South Asian | 8.1  | -11.59641089 |
| <b>4006</b> | 35 | South Asian | 22.8 | -11.6263379  |
| <b>6533</b> | 65 | South Asian | 9.2  | -11.63456126 |
| <b>4083</b> | 32 | South Asian | 9.1  | -11.6611742  |
| <b>3076</b> | 56 | South Asian | 23.7 | -11.67405134 |
| <b>4081</b> | 60 | South Asian | 9    | -11.73619485 |
| <b>4118</b> | 67 | South Asian | 7.8  | -11.79866315 |
| <b>4197</b> | 51 | South Asian | 12.6 | -12.09814719 |
| <b>6552</b> | 36 | South Asian | 10.9 | -12.16150836 |
| <b>4109</b> | 65 | South Asian | 20.7 | -12.23362344 |
| <b>2925</b> | 70 | South Asian | 6.2  | -12.27287616 |
| <b>4186</b> | 63 | South Asian | 9.6  | -12.27646457 |
| <b>3113</b> | 44 | South Asian | 13.7 | -12.29931626 |
| <b>6411</b> | 31 | South Asian | 14.1 | -12.31434169 |
| <b>6460</b> | 74 | South Asian | 2.8  | -12.34217453 |
| <b>3150</b> | 64 | South Asian | 7.4  | -12.56828306 |
| <b>4089</b> | 39 | South Asian | 6.7  | -12.60392392 |
| <b>2902</b> | 48 | South Asian | 10   | -12.69489872 |
| <b>6530</b> | 40 | South Asian | 9.1  | -12.71506122 |
| <b>4048</b> | 62 | South Asian | 6.6  | -12.73559273 |
| <b>4079</b> | 35 | South Asian | 9.5  | -12.78775745 |
| <b>4332</b> | 71 | South Asian | 9.5  | -12.82634551 |
| <b>4028</b> | 42 | South Asian | 6.5  | -12.85311598 |
| <b>3104</b> | 45 | South Asian | 15.5 | -12.9050852  |
| <b>6577</b> | 37 | South Asian | 10.2 | -12.96598552 |
| <b>4151</b> | 38 | South Asian | 1    | -12.96902899 |
| <b>4036</b> | 66 | South Asian | 13.1 | -13.01539422 |
| <b>4045</b> | 55 | South Asian | 11.9 | -13.03540715 |
| <b>2911</b> | 50 | South Asian | 15.1 | -13.03696001 |
| <b>3095</b> | 39 | South Asian | 21.3 | -13.05864374 |
| <b>4383</b> | 66 | South Asian | 6.6  | -13.14983955 |
| <b>6464</b> | 61 | South Asian | 8.9  | -13.24504178 |
| <b>2918</b> | 41 | South Asian | 11.9 | -13.37360075 |
| <b>3094</b> | 60 | South Asian | 7.8  | -13.41900783 |
| <b>4127</b> | 45 | South Asian | 10   | -13.45348166 |
| <b>4086</b> | 35 | South Asian | 23.3 | -13.54620397 |
| <b>4073</b> | 55 | South Asian | 10.9 | -13.58341118 |
| <b>4052</b> | 50 | South Asian | 9.9  | -13.59536045 |
| <b>2980</b> | 80 | South Asian | 9.3  | -13.621963   |
| <b>4218</b> | 49 | South Asian | 42.5 | -13.68622476 |
| <b>6475</b> | 32 | South Asian | 43.7 | -13.69925568 |
| <b>2907</b> | 58 | South Asian | 13.5 | -13.70112797 |
| <b>2891</b> | 38 | South Asian | 9    | -13.70655476 |

|               |    |             |      |              |
|---------------|----|-------------|------|--------------|
| <b>2914</b>   | 64 | South Asian | 58.8 | -13.77832884 |
| <b>6456</b>   | 66 | South Asian | 4.8  | -13.8264128  |
| <b>4379</b>   | 34 | South Asian | 19.6 | -13.86896535 |
| <b>4190</b>   | 55 | South Asian | 28   | -13.912532   |
| <b>6574</b>   | 61 | South Asian | 5.9  | -13.95591526 |
| <b>6432</b>   | 63 | South Asian | 17.7 | -13.98644203 |
| <b>4245</b>   | 52 | South Asian | 20.3 | -14.00082483 |
| <b>6467</b>   | 62 | South Asian | 10.2 | -14.00705625 |
| <b>2929</b>   | 47 | South Asian | 12.2 | -14.04149785 |
| <b>C-1721</b> | 36 | South Asian | 17   | -14.04388089 |
| <b>4080</b>   | 33 | South Asian | 26.2 | -14.0773573  |
| <b>6436</b>   | 66 | South Asian | 43.4 | -14.12736872 |
| <b>2920</b>   | 44 | South Asian | 9.7  | -14.18788681 |
| <b>6406</b>   | 77 | South Asian | 11.9 | -14.23632666 |
| <b>6588</b>   | 74 | South Asian | 3.3  | -14.2908565  |
| <b>4069</b>   | 40 | South Asian | 10.2 | -14.30085712 |
| <b>4110</b>   | 46 | South Asian | 30.8 | -14.31055466 |
| <b>4085</b>   | 35 | South Asian | 23.1 | -14.3517953  |
| <b>4026</b>   | 45 | South Asian | 18.6 | -14.39898481 |
| <b>3097</b>   | 35 | South Asian | 16   | -14.42134591 |
| <b>6446</b>   | 31 | South Asian | 46.4 | -14.45942647 |
| <b>4060</b>   | 45 | South Asian | 18.1 | -14.51228246 |
| <b>4320</b>   | 70 | South Asian | 13.2 | -14.51548452 |
| <b>4345</b>   | 74 | South Asian | 26.6 | -14.5937991  |
| <b>4328</b>   | 66 | South Asian | 58.8 | -14.75657887 |
| <b>6589</b>   | 65 | South Asian | 17   | -14.757847   |
| <b>6525</b>   | 67 | South Asian | 10.4 | -14.77200067 |
| <b>4064</b>   | 38 | South Asian | 14.8 | -14.79229993 |
| <b>4061</b>   | 40 | South Asian | 19.2 | -14.89496973 |
| <b>6578</b>   | 40 | South Asian | 23.4 | -14.96588391 |
| <b>4047</b>   | 39 | South Asian | 14.7 | -14.97024858 |
| <b>4065</b>   | 55 | South Asian | 20.5 | -15.01136507 |
| <b>4029</b>   | 37 | South Asian | 11.4 | -15.01247015 |
| <b>4318</b>   | 35 | South Asian | 10.1 | -15.03450583 |
| <b>2909</b>   | 64 | South Asian | 8.5  | -15.07357858 |
| <b>6559</b>   | 39 | South Asian | 26.7 | -15.11921385 |
| <b>4096</b>   | 59 | South Asian | 10   | -15.15680706 |
| <b>6502</b>   | 39 | South Asian | 6.8  | -15.18464847 |
| <b>4131</b>   | 64 | South Asian | 8.1  | -15.21519467 |
| <b>6454</b>   | 70 | South Asian | 10   | -15.2357621  |
| <b>6493</b>   | 70 | South Asian | 13.4 | -15.28154381 |
| <b>6507</b>   | 37 | South Asian | 9.7  | -15.28310966 |
| <b>3087</b>   | 33 | South Asian | 7.7  | -15.29434117 |
| <b>4146</b>   | 37 | South Asian | 14.9 | -15.3199525  |
| <b>3082</b>   | 53 | South Asian | 14.2 | -15.35600422 |
| <b>6410</b>   | 65 | South Asian | 14.6 | -15.45175959 |

|               |    |             |       |              |
|---------------|----|-------------|-------|--------------|
| <b>4180</b>   | 54 | South Asian | 13    | -15.48898745 |
| <b>2931</b>   | 79 | South Asian | 12.3  | -15.52555514 |
| <b>4044</b>   | 39 | South Asian | 11    | -15.60847003 |
| <b>4039</b>   | 53 | South Asian | 12.4  | -15.65280289 |
| <b>6572</b>   | 36 | South Asian | 23.2  | -15.65445734 |
| <b>4136</b>   | 46 | South Asian | 6.9   | -15.67696051 |
| <b>6442</b>   | 32 | South Asian | 19.3  | -15.74704916 |
| <b>6523</b>   | 74 | South Asian | 15.2  | -16.027447   |
| <b>4074</b>   | 42 | South Asian | 22.6  | -16.03540493 |
| <b>6522</b>   | 61 | South Asian | 18.8  | -16.05152259 |
| <b>4062</b>   | 45 | South Asian | 15.6  | -16.11167169 |
| <b>4352</b>   | 39 | South Asian | 22.1  | -16.21978522 |
| <b>4057</b>   | 60 | South Asian | < 1.0 | -16.22524854 |
| <b>4053</b>   | 32 | South Asian | 8.4   | -16.26460249 |
| <b>6455</b>   | 63 | South Asian | 7.4   | -16.29386996 |
| <b>2919</b>   | 58 | South Asian | 10.9  | -16.39384894 |
| <b>4051</b>   | 45 | South Asian | 8.3   | -16.4065916  |
| <b>4330</b>   | 70 | South Asian | 9.9   | -16.46012397 |
| <b>6513</b>   | 38 | South Asian | 12.7  | -16.47841585 |
| <b>4310</b>   | 32 | South Asian | 34.6  | -16.49561706 |
| <b>2892</b>   | 45 | South Asian | 7.8   | -16.51297947 |
| <b>6453</b>   | 38 | South Asian | 21.1  | -16.52538466 |
| <b>4091</b>   | 37 | South Asian | 15.3  | -16.71770313 |
| <b>6433</b>   | 62 | South Asian | 26.9  | -16.8977967  |
| <b>4305</b>   | 50 | South Asian | 14.5  | -17.06621881 |
| <b>3100</b>   | 44 | South Asian | 26.1  | -17.16885917 |
| <b>4084</b>   | 50 | South Asian | 10.2  | -17.22712416 |
| <b>6508</b>   | 66 | South Asian | 8     | -17.32174512 |
| <b>4071</b>   | 46 | South Asian | 19.8  | -17.34975725 |
| <b>C-1710</b> | 34 | South Asian | 8     | -17.38713621 |
| <b>6558</b>   | 32 | South Asian | 11.6  | -17.46977241 |
| <b>6555</b>   | 73 | South Asian | 5     | -17.77180019 |
| <b>3092</b>   | 44 | South Asian | 12.3  | -17.80757706 |
| <b>6540</b>   | 70 | South Asian | 2.7   | -17.81278918 |
| <b>6444</b>   | 80 | South Asian | 105.1 | -17.8840609  |
| <b>2888</b>   | 40 | South Asian | 20.4  | -17.90165038 |
| <b>2930</b>   | 61 | South Asian | 4.7   | -18.03339238 |
| <b>2932</b>   | 61 | South Asian | 8.8   | -18.11508492 |
| <b>4361</b>   | 32 | South Asian | 17.5  | -18.15728766 |
| <b>4082</b>   | 38 | South Asian | 9     | -18.2265657  |
| <b>4353</b>   | 62 | South Asian | 12.5  | -18.28248184 |
| <b>C-1731</b> | 54 | South Asian | 9.1   | -18.28276228 |
| <b>3093</b>   | 40 | South Asian | 12.2  | -18.47459168 |
| <b>6514</b>   | 35 | South Asian | 12.2  | -18.48177373 |
| <b>2910</b>   | 63 | South Asian | 7.2   | -18.60207634 |
| <b>3086</b>   | 51 | South Asian | 12.3  | -18.63901728 |

|               |    |             |       |              |
|---------------|----|-------------|-------|--------------|
| <b>4358</b>   | 34 | South Asian | 19.1  | -18.76147834 |
| <b>6562</b>   | 39 | South Asian | 2.4   | -19.00618333 |
| <b>2933</b>   | 52 | South Asian | 8.6   | -19.0358869  |
| <b>3081</b>   | 45 | South Asian | 5.6   | -19.13876109 |
| <b>2896</b>   | 33 | South Asian | 13.8  | -19.15372702 |
| <b>6518</b>   | 76 | South Asian | 4.4   | -19.16949321 |
| <b>4344</b>   | 70 | South Asian | 6.7   | -19.170256   |
| <b>6580</b>   | 68 | South Asian | 8.8   | -19.21481808 |
| <b>6556</b>   | 36 | South Asian | 8.1   | -19.22440183 |
| <b>4323</b>   | 71 | South Asian | 11.5  | -19.23274392 |
| <b>6450</b>   | 35 | South Asian | 22.2  | -19.29056233 |
| <b>6496</b>   | 62 | South Asian | 13.3  | -19.31674975 |
| <b>3101</b>   | 67 | South Asian | 2.4   | -19.48631135 |
| <b>6421</b>   | 35 | South Asian | 20.2  | -19.6364512  |
| <b>6534</b>   | 31 | South Asian | 23.9  | -19.63778635 |
| <b>4386</b>   | 61 | South Asian | 17.1  | -19.65653157 |
| <b>3102</b>   | 36 | South Asian | 17.7  | -19.6871799  |
| <b>C-1723</b> | 40 | South Asian | 8.4   | -19.70069729 |
| <b>6417</b>   | 33 | South Asian | 7.7   | -19.73363676 |
| <b>C-1735</b> | 44 | South Asian | 7.2   | -19.85786146 |
| <b>4400</b>   | 61 | South Asian | 12.5  | -19.92607916 |
| <b>3074</b>   | 45 | South Asian | 3.5   | -19.96482163 |
| <b>2934</b>   | 46 | South Asian | 6.2   | -20.10639833 |
| <b>4307</b>   | 37 | South Asian | 11.3  | -20.16219414 |
| <b>6553</b>   | 71 | South Asian | 16.1  | -20.36945281 |
| <b>6526</b>   | 38 | South Asian | 5.1   | -20.44301964 |
| <b>3075</b>   | 50 | South Asian | 9.5   | -20.50549706 |
| <b>6527</b>   | 40 | South Asian | 25.2  | -20.62025261 |
| <b>3091</b>   | 38 | South Asian | 7.7   | -20.88001887 |
| <b>6585</b>   | 34 | South Asian | 13.8  | -21.34846187 |
| <b>6560</b>   | 61 | South Asian | 11.9  | -21.67780741 |
| <b>3090</b>   | 39 | South Asian | 31.5  | -21.77370823 |
| 6483          | 75 | South Asian | 118.9 | -21.8434     |
| <b>2948</b>   | 51 | South Asian | 8     | -21.88494736 |
| <b>4341</b>   | 71 | South Asian | 3.9   | -22.07302939 |
| <b>3098</b>   | 33 | South Asian | 21.2  | -22.25357647 |
| <b>C-1751</b> | 31 | South Asian | 3.2   | -22.53858139 |
| <b>6524</b>   | 40 | South Asian | 10.3  | -22.73502471 |
| <b>4338</b>   | 39 | South Asian | 9.2   | -22.79107663 |
| <b>3079</b>   | 53 | South Asian | 208.1 | -23.16845801 |
| <b>C-1753</b> | 40 | South Asian | 33    | -23.39705094 |
| <b>6519</b>   | 62 | South Asian | 2.7   | -23.63353813 |
| <b>C-1737</b> | 35 | South Asian | 2.8   | -23.81972578 |
| <b>3084</b>   | 43 | South Asian | 18    | -23.88931575 |
| <b>2923</b>   | 44 | South Asian | 19.9  | -24.00540125 |
| <b>6466</b>   | 33 | South Asian | 7.1   | -24.10861273 |

|               |    |             |      |              |
|---------------|----|-------------|------|--------------|
| <b>C-1707</b> | 32 | South Asian | 29.6 | -24.50885066 |
| <b>C-1733</b> | 52 | South Asian | 9.2  | -24.56867677 |
| <b>6511</b>   | 40 | South Asian | 8.7  | -24.6087921  |
| <b>C-1722</b> | 40 | South Asian | 7.3  | -24.83072984 |
| <b>3089</b>   | 38 | South Asian | 15.9 | -24.8935357  |
| <b>6520</b>   | 39 | South Asian | 16.9 | -25.12061209 |
| <b>C-1750</b> | 37 | South Asian | 16   | -25.31449743 |
| <b>6547</b>   | 31 | South Asian | 21.5 | -25.97973629 |
| <b>6463</b>   | 67 | South Asian | 7.6  | -26.94368868 |
| <b>2915</b>   | 69 | South Asian | 10.1 | -27.32825858 |
| <b>C-1727</b> | 44 | South Asian | 6.2  | -27.35216704 |
| <b>2924</b>   | 65 | South Asian | 7.7  | -30.05139056 |
| <b>C-1713</b> | 35 | South Asian | 7.6  | -30.11699218 |
